# Machine learning to predict the source of campylobacteriosis using whole genome data

Nicolas Arning<sup>\*1</sup>, Samuel K. Sheppard<sup>2</sup>, David A. Clifton<sup>3</sup> and Daniel J. Wilson<sup>1</sup>

<sup>1</sup> Big Data institute, Nuffield Department of Population Health, University of Oxford, Li Ka Shing Centre for Health Information and Discovery, Old Road Campus, Oxford, OX3 7LF, UK

<sup>2</sup> The Milner Centre of Evolution, Department of Biology & Biochemistry, University of Bath, Claverton Down, Bath, BA2 7AZ, UK

<sup>3</sup> Institute of Biomedical Engineering, Department of Engineering Science, University of Oxford, OX3 7DQ, UK

## Abstract

Campylobacteriosis is among the world's most common foodborne illnesses, caused predominantly by the bacterium *Campylobacter jejuni*. Effective interventions require determination of the infection source which is challenging as transmission occurs via multiple sources such as contaminated meat, poultry, and drinking water. Strain variation has allowed source tracking based upon allelic variation in multi-locus sequence typing (MLST) genes allowing isolates from infected individuals to be attributed to specific animal or environmental reservoirs. However, the accuracy of probabilistic attribution models has been limited by the ability to differentiate isolates based upon just 7 MLST genes. Here, we broaden the input data spectrum to include core genome MLST (cgMLST) and whole genome sequences (WGS), and implement multiple machine learning algorithms, allowing more accurate source attribution. We increase attribution accuracy from 64% using the standard iSource population genetic approach to 71% for MLST, 85% for cgMLST and 78% for kmerized WGS data using machine learning. To gain insight beyond the source model prediction, we use Bayesian inference to analyse the relative affinity of *C. jejuni* strains to infect humans and identified potential differences, in source-human transmission ability among clonally related isolates in the most common disease causing lineage (ST-21 clonal complex). Providing generalizable computationally efficient methods, based upon machine learning and population genetics, we provide a scalable approach to global disease surveillance that can continuously incorporate novel samples for source attribution and identify fine-scale variation in transmission potential.

## Author summary

*C. jejuni* are the most common cause of food-borne bacterial gastroenteritis but the relative contribution of different sources are incompletely understood. We traced the origin of human *C. jejuni* infections using machine learning algorithms that compare the DNA sequences of bacteria sampled from infected people, contaminated chickens, cattle, sheep, wild birds and the environment. This approach achieved improvement in accuracy of source attribution by 33% over existing methods that use only a subset of genes within the genome and provided evidence for the relative contribution of different infection sources. Sometimes even very similar bacteria showed differences, demonstrating the value of basing analyses on the entire genome when developing this algorithm that can be used for understanding the global epidemiology and other important bacterial infections.

## 1 Introduction

2 *Campylobacter jejuni* and *Campylobacter coli* are among the most common causes of gastroenteritis  
3 globally and are responsible for approximately nine million annual cases in the European Union (1,2).  
4 These zoonotic bacteria are a common commensal constituent of the gut microbiota of bird and  
5 animal species (3,4) but cause serious infections in humans. Symptoms include nausea, fever,  
6 abdominal pain, and severe diarrhoea, with potential for the development of debilitating, and  
7 sometimes fatal, sequelae (5,6). Various infection sources have been identified including animal  
8 faeces, contaminated drinking water and especially raw or under-cooked poultry and other meats (7).  
9 However, effectively combating disease requires a detailed understanding of the relative contribution  
10 of different sources to human infection.

11  
12 As in many other bacterial species, *Campylobacter* populations represent diverse assemblages of  
13 strains (3,8–10). Within this structured population, some lineages are more commonly observed in  
14 particular host species (3,4,11). Because of this host association, DNA sequence comparisons of  
15 bacteria from human gastroenteritis and potential reservoir populations have potential to reveal the  
16 infection source. This has identified contaminated poultry as a major source of human infection  
17 (12,13). Based on the body of evidence including DNA sequence analysis (14), targeted interventions  
18 have been implemented, including improved biosecurity measures on poultry farms, which have  
19 halved recorded campylobacteriosis cases in New Zealand (15,16).

20  
21 Extending the principal of linking source-sink populations using genotype data, methods have been  
22 developed to attribute *C. jejuni* to the likely source based on bacterial gene frequencies in potential  
23 reservoir populations (17,18). Among the most common genotyping approaches for *C. jejuni* has been

24 multi-locus sequence typing (MLST) that catalogues DNA sequence variation across seven  
25 housekeeping genes that are common to all strains (19,20). Isolates with identical alleles at all loci are  
26 assigned to the same sequence type (ST) and those with identical sequences at most or all loci are  
27 grouped within the same clonal complex (CC). Using these data, and allele frequencies, it has been  
28 possible to probabilistically assign clinical isolates (STs and CCs) to host source using source attribution  
29 models such as the asymmetric island model implemented in *iSource* (17) and the Bayesian population  
30 assignment model STRUCTURE (18,21). Both methods have been instructive in estimating the relative  
31 contribution of a range of domestic and wild animal hosts to human infection, with poultry often  
32 identified as the principal source of human campylobacteriosis across different regions and countries  
33 (17,18,22–25).

34

35 There are two main limitations when using genotype data to for bacterial source attribution. The first  
36 is that the ability to attribute is only as good as the degree of genotype segregation. For example, in  
37 *C. jejuni* there are host restricted genotypes (3,26) that can be readily attributed to a given host source  
38 when observed in human infections, as well as ecological generalists (27,28) that have relatively  
39 recently transitioned between hosts and cannot therefore be attributed with confidence (29). While  
40 host switching potentially imposes a biological constraint on quantitative attribution models, the  
41 second limitation is far more tractable. Specifically, most current source attribution methods are  
42 subject to limitations imposed by the underlying data. Reflecting the technology of the time, MLST-  
43 based source attribution is based only on a small fraction of the genome (approximately 0.2% for *C.*  
44 *jejuni* (25)) and there is considerable potential for better strain differentiation using current  
45 techniques.

46

47 The increasing availability of large whole genome sequence (WGS) datasets has greatly enhanced

48 analyses of bacterial population structure and diversity (30). However, exploiting the full information  
49 can be challenging due to variable gene content and the complexity of interpreting the short reads  
50 produced by next generation sequencing. Notwithstanding this, some studies have attempted to  
51 overcome the limited discriminatory power of MLST in attribution studies by screening WGS data to  
52 identify elements (SNPs and genes) that segregate by host (31–33). Using these host segregating  
53 markers as input data has improved the resolution of existing attribution models, including  
54 STRUCTURE, and provided information about potential infection reservoirs and the UK and France.  
55 However, using bespoke marker selection approaches with software designed for MLST data does not  
56 maximize the potential of WGS data for source attribution.

57

58 Here, we present a machine learning approach using WGS data to predict the source of human *C. jejuni*  
59 infection. This has two principal advantages over existing techniques. First, building on WGS-based  
60 machine learning source attribution approaches applied to *Salmonella enterica* and *Escherichia coli*  
61 (34,35), we take an agnostic approach to identify which machine learning tool performs best from a  
62 broad range of available algorithms. Second, we use a WGS input capture approach using data types  
63 deposited in public databases allowing the analysis of existing MLST, core-genome MLST and WGS  
64 datasets and the reuse of data for continuous updatable monitoring in a generalizable framework.  
65 Thus, we aimed to overcome limitations of the currently available methods and use the output to  
66 investigate the infective potential of *C. jejuni* strains.

67

## 68 **Methods**

### 69 **Dataset acquisition**

70 A total of 5,798 *C. jejuni* and *C. coli* genomes isolated from various sources and host species were

71 available on the public database for molecular typing and microbial genome diversity: PubMLST  
72 (<https://pubmlst.org/>) (S1 Table). WGS data corresponded to MLST ST and CC designations as well as  
73 core genome (cg) MLST classes. The dataset was divided into training (75%) and testing (25%) sets  
74 using phylogeny-aware sorting, wherein all members of one ST were sorted entirely into either training  
75 or testing sets (S1 Table). The ST based sorting accounts for the phylogenetic non-independence of  
76 samples (36). To allow for sufficient sample sizes per reservoir population (hereafter “class”), only the  
77 five most prevalent classes for MLST and cgMLST were used (chicken, cattle, sheep, wild bird and  
78 environment). For farm animals the classes “chicken” and “chicken offal or meat” were combined to  
79 “chicken” (likewise for sheep and cattle), whilst “environment”, “sand” and “river water” were  
80 combined into “environment”, consistent with previous studies (18,37).

81

## 82 **Feature engineering**

83 The allelic profiles of MLST and cgMLST were used directly. To potentially exploit the gradient of  
84 separation encoded in the sequences underlying the MLST allelic profiles, we downloaded the  
85 underlying allele sequences and encoded the nucleotides as dummy variables and k-mers (k=21) using  
86 DSK (38). DSK was also used for encoding the WGS as k-mers. Using k=21 led to a prohibitively large  
87 input vector due to the number of unique k-mers found in all genomes (109,675,176). We reduced the  
88 number of k-mers by applying a variance threshold where k-mers which were present or absent in  
89 more than 99% of the samples were discarded, reducing the numbers of unique k-mers to 7,285,583.  
90 Furthermore, we performed feature selection by testing the dependence of the source labels on every  
91 individual k-mer using the Chi-Square statistic. To avoid data-leakage we only performed the feature  
92 selection using the training data and labels to select the 100,000 k-mers with the highest score.

93

## 94 **Algorithm training**

95 All machine learning and deep learning was performed in Python (for a list of all algorithms see Figure  
96 1). The xgboost library (39) was used for the gradient boosting classifiers with all other machine  
97 learners implemented in scikit-learn (40). The hyper-parameters for each classifier were chosen using  
98 Cartesian grid search on five-fold cross-validation of the training set. The Keras library  
99 (<https://github.com/keras-team/keras>) was used to construct deep learning algorithms aimed at  
100 supplying a wide range of commonly used architectures. We found this to work best, empirically, given  
101 that there is no principled means of architecture selection for such models. Specifically: (i) A recurrent  
102 neural network consisting of a layer with 64 gated recurrent units, a 50% dropout layer and Rectified  
103 Linear Unit (ReLU) activation layer; (ii) A 1-dimensional convolutional network with two convolutional  
104 layers of kernel size 3 and 5 respectively and 30 filters, both followed by 50% dropout layers and a  
105 ReLU layer; (iii) A Long short-term memory network consisting of one LSTM layer with 64 units and a  
106 50% dropout layer; (iv) A Shallow dense network with one dense layer with 64 units followed by a 50%  
107 dropout layer and a ReLU activation layer; (v) A Deep dense network with 6 dense layers starting with  
108 128 units and halving units with each successive layer. All individual dense layers are followed by a  
109 50% dropout layer and a ReLU layer.

110

111 To all deep learning architectures, we added an output layer comprising a dense layer with soft-max  
112 activation with one unit for every class. We encoded the labels as dummy variables and used  
113 categorical cross-entropy as a loss function together with the Adam optimiser (41). Cyclical learning  
114 rates were used with a maximum learning rate of 0.1 and a minimum learning rate of 0.0001 to  
115 overcome local minima. The accuracy on the test set was measured at every epoch and the overall  
116 best performing weights were stored as a checkpoint. The data was deployed in batches of 128  
117 samples with every batch randomly undersampled so that each class was represented in equal

118 proportions. The training was run for 500 generations with early stopping after 50 generations.

119

## 120 **Algorithm testing**

121 Both machine learning and deep learning were tested on the same 25% test set. The original data were  
122 skewed in source composition by ratios which did not necessarily reflect source origin of infection. We  
123 therefore used two methods to rebalance the classes in testing. The first test set featured an even  
124 distribution of classes, whereas the second undersampled the over-abundant chicken-origin genomes  
125 to emulate relative contribution to human disease. We used the ratios predicted by Wilson et al. (12),  
126 where *Campylobacter* genomes from chickens were 1.61 times more common than those from cattle.  
127 In both methods, rebalancing the classes was achieved by undersampling, which we repeated 200  
128 times with replacement and averaged the accuracy over all iterations whilst also recording the  
129 variance. For performance metrics we registered accuracy, precision (positive predictive value), recall  
130 (sensitivity), F1, negative predictive value, specificity and speed. Speed was measured relative to other  
131 classifiers where a scale was defined with 0 being the slowest classifier and 1 being the quickest and  
132 all intermediate values being normalised within these confines. For comparison to previous methods,  
133 iSource was applied to the test dataset (17). Having established that XGBoost on cgMLST was the best  
134 performing source attribution method, we retrained the classifier with both training and testing data  
135 and applied it to all 15,988 human cgMLST samples available on the PubMLST database. The prediction  
136 took 892 milliseconds on a Dell OptiPlex 7060 desktop using ten threads on an Intel Core i7-8700 CPU  
137 and 16 GB RAM.

138

## 139 **Phylogenetic analysis**

140 We defined the generalist index as the number of sources the ST was found in across all isolates in the

141 dataset, which included additional samples for which only MLST data was available (S1 Table). We  
142 built a phylogeny of CC21 genomes from both source-associated and human isolates using Neighbour  
143 Joining, based on pairwise hamming distances of k-mer presence/absence in the WGS dataset, as  
144 described by Hedge and Wilson (42). We used TreeBreaker to infer the evolution of phenotypes across  
145 the phylogenetic tree of ST-21 and the most closely related sequence types. The known labels of the  
146 source-associated samples were used as phenotypic information for input into TreeBreaker (43)  
147 together with the phylogeny of CC21. TreeBreaker was run for 5,500,000 iterations with 500,000  
148 iterations as burn-in and 1000 iterations between sampling. The phylogenetic trees were visualised  
149 with Microreact (44) and arranged alongside the results of TreeBreaker in Inkscape.

150

## 151 **Results and Discussion**

### 152 **Machine learning outperforms popular attribution models for MLST data**

153 In order to anchor our source attribution performance to previous efforts, we compared results using  
154 the machine learning classifiers to source probabilities estimated using the asymmetric island model  
155 implemented in iSource, which is based on MLST and the most commonly used source attribution  
156 method to date (45). The best performing machine learner on the MLST allelic profile was a random  
157 forest (61.9%/68.5% balanced/unbalanced) which performed slightly better than iSource (61%/64%)  
158 (Figure 1). Since loci within allelic profiles are deemed either to match or not, and underlying  
159 nucleotides sequences are ignored, we investigated whether exploiting the gradient of nucleotide  
160 differentiation would lead to better attribution. We used dummy variables and generated k-mers from  
161 the sequences underlying the MLST allele labels. The additional feature encodings boosted the top  
162 achieving accuracies on MLST to 67.9%/70.7% from dummy variables and 63%/67.5% from k-mers,  
163 showing the value of the additional nucleotide-level information.



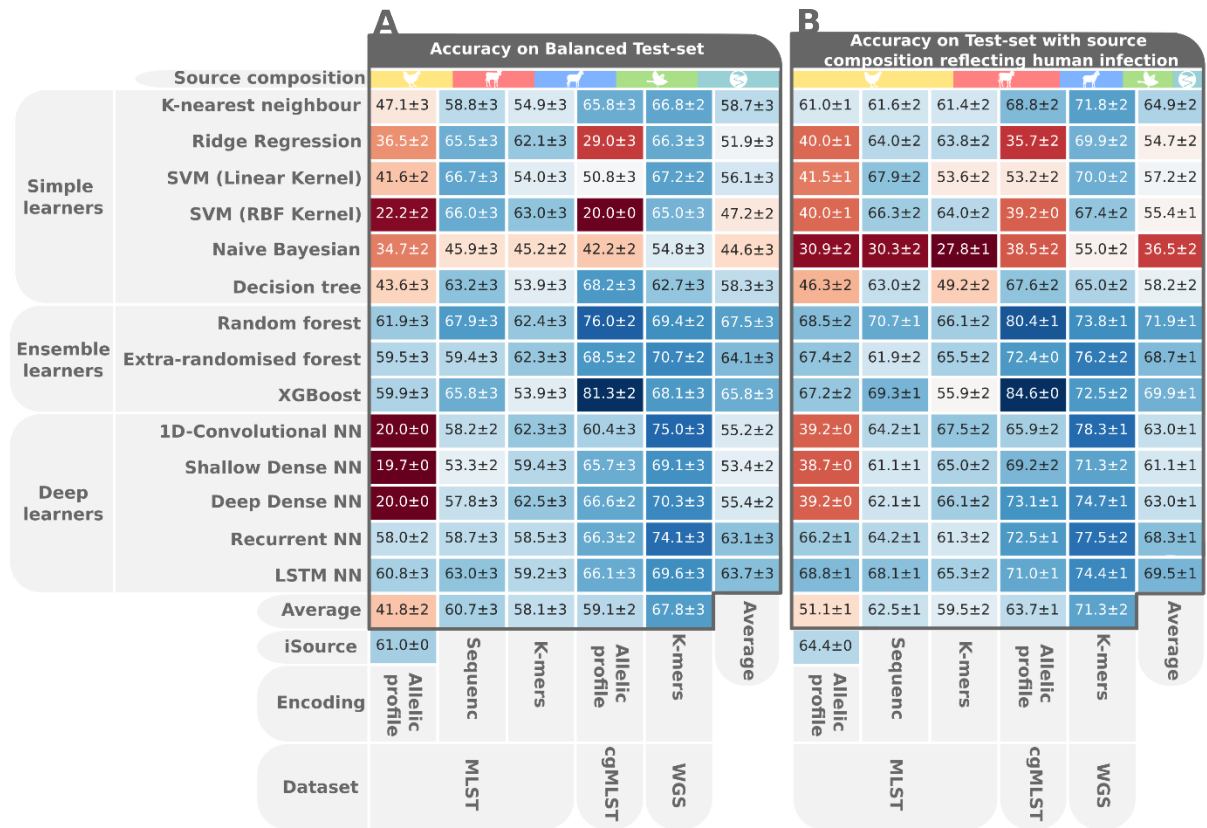

164

165 **Figure 1:** A heatmap showing classifier performance on the class balanced (A) and imbalanced (B) test  
 166 set. The individual cells are coloured according to the average accuracy on 200 rounds of resampling  
 167 with replacement with the variance noted next to the average accuracy. The averages of accuracy per  
 168 classifiers are shown in the rightmost column, whereas the bottom column shows the averages per  
 169 data type.

170

171 **Core genome and WGS datasets increase the power of source attribution**  
 172 **models**

173 Having established the competitiveness of machine learning approaches for source attribution using  
 174 MLST data, we turned our attention to whole genome datasets. Gene-by-gene approaches to  
 175 cataloguing genomic variation in *Campylobacter* (46) and other species are a logical extension of  
 176 seven-locus MLST in response to the increasing availability of large WGS datasets. Formalizing this

177 approach to derive an approximation of the core genome for *C. jejuni* allowed the implementation of  
178 a cgMLST scheme containing 1,343 genes, that are present in the majority (>95%) of *C. jejuni* genomes  
179 (47). This has potential to increase the power of attribution models to discriminate the source of  
180 *Campylobacter* isolates based on host segregating genetic variation within the genome (37). The  
181 strong performance of tree-based ensemble classifiers continued when using cgMLST data where the  
182 XGBoost classifier achieved 81.3%/84.6% accuracy, the highest accuracy over all data types and  
183 classifiers.

184 q

185 Next, we assessed the relative performance of machine learners when applied to k-mers produced  
186 from WGS, where the average attribution performance was the highest among all datasets. The best-  
187 performing algorithm was a 1-D convolutional neural net (75.0/78.3%), performing better than the  
188 top-achieving classifier on MLST but worse than the best classifier on cgMLST despite WGS encoding  
189 more genomic information. This may be explained by the feature selection used to limit the input  
190 vector to 100,000 k-mers. Beyond comparing classifier performance on different data types, we also  
191 wanted to investigate what led to the difference in performance.

192

193 The comparison of average accuracy across all data types reveals that with an increase in encoded  
194 variation the average performance across all algorithms improves. This is especially apparent in MLST  
195 where, although capturing the same 0.3% of the genome in all isolates, the additional variation in the  
196 underlying sequences can be leveraged for better performance. When comparing the average  
197 accuracy between classifiers we observed that decision-tree based ensemble learners performed well  
198 across all datasets, with random forests performing best on average. The excellent performance of  
199 ensemble tree learners on genomic data has been reported on genomic data (48–50) and is linked to  
200 their ability to handle correlation as well as interaction of features which is an inherent feature of

201 genomic data (50).

202

203 Amongst simple learners the K-nearest neighbour algorithm (KNN) performed best, probably owing to  
204 the hereditary nature of the phenotypic trait used as classes here. Host association is inherited both  
205 genetically, in the ability to colonise different hosts, and environmentally, in the colocation of parent  
206 and offspring cells. These patterns of inheritance result in more closely related sequences being more  
207 likely to be associated with the same phenotype. Heritability could explain the success of the KNN  
208 algorithm which is based on proximity in hyperdimensional feature space (51), which in our case is  
209 genetic similarity which is a proxy for relatedness.

210

211 The deep learners generally improved in performance with higher dimensionality of the input data -  
212 from MLST to WGS data. Among all deep learning architectures, the RNN and LSTM performed best,  
213 which was to be expected as DNA is transcribed, and mRNA translated, sequentially 5' to 3'. Both RNNs  
214 and LSTMs process input data sequentially and input weights are also adjusted sequentially in back-  
215 propagation as opposed to the dense or convolutional architectures where input weights are tweaked  
216 concurrently. Having investigated trends across all datasets and algorithms we focused on the best-  
217 achieving classifier for a more thorough analysis of how classification performance was driven by  
218 different factors within the underlying data.

219

## 220 **Host transition imposes a biological limit on source attribution models**

221 To better understand the limitations of attribution algorithms we investigated the factors driving  
222 misclassification in the different models with different datasets. The XGBoost implementation of  
223 gradient boosted decision trees, using the cgMLST dataset, was the overall best-performing classifier  
224 in our analyses. Consequently, this was used to investigate attribution performance further (Figure 2).

225 Among all source populations the most frequent misclassification was found between sheep and  
 226 cattle, which is a common source of errors in source attribution (17) owing to strongly overlapping  
 227 gene pools stemming from frequent cross-species transmission that may reflect commonalities in  
 228 physiological features of the ruminant gastrointestinal tracts (52). We also looked at factors besides  
 229 source reservoir of the sample, as circumstances like geographical origin of the isolate (56) and the  
 230 season in which they were sampled (57) have been shown to influence source attribution. We  
 231 therefore stratified classification accuracy by continent, year, generalist index and *Campylobacter*  
 232 species using the full non-undersampled Test dataset (Figure 3, S1 Table).

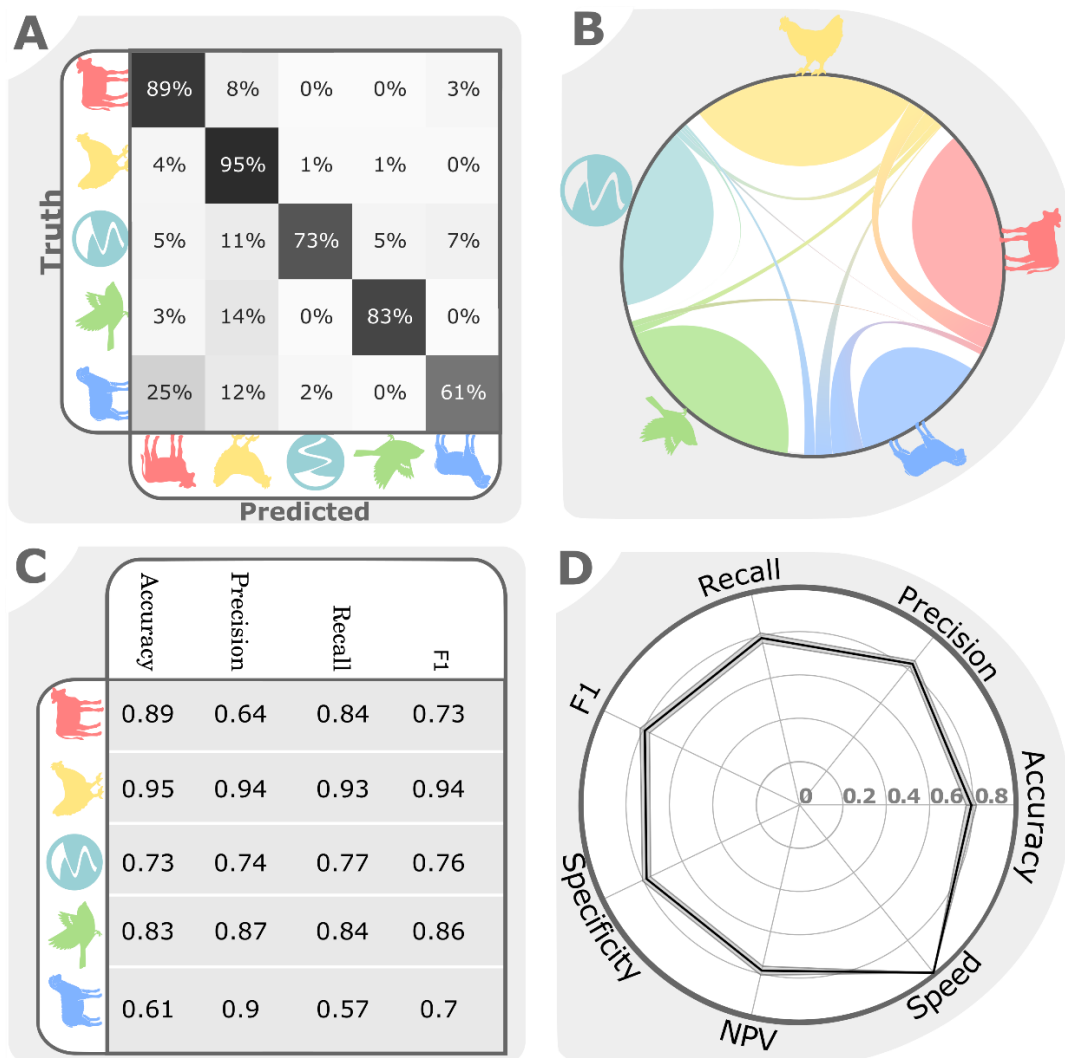

233

234 **Figure 2:** XGBoost Classifier performance on cgMLST: A) Misclassification matrix per source. The

235 diagonal represents correct classification and off-diagonal fields are misclassifications. The  
236 percentages are calculated per row. B) Misclassification matrix as depicted in a flow diagram. C)  
237 Classifier performance on the unbalanced test set according to four different metrics per source  
238 population. D) Radar plot showing the classifier performance on the unbalanced test by seven metrics  
239 averaged over 200 rounds of resampling with replacement. The variation is depicted as a shaded  
240 surface underneath the black line representing the average.

241

242 Investigating the accuracy of the XGBoost classifier per sample size revealed that the low number of  
243 wild bird samples (212 samples; 84% accuracy) did not impede classification performance when  
244 compared to more abundant source samples like cattle (716 samples; 84% accuracy) and sheep (584  
245 samples; 57% accuracy), presumably because wild bird STs tend to be atypical compared to the other  
246 reservoirs (46). To investigate how the ability to colonise multiple hosts affected performance, we  
247 defined a 'generalist index' as the number of hosts in which an ST was found across all PubMLST  
248 samples (S1 Table). The performance across generalist indices showed that strains restricted to fewer  
249 hosts were predicted with higher accuracy. This is likely due to host switching blurring the source-  
250 specific genetic signal, as previously reported (29). Consistent with this, 58% of all wild bird samples  
251 belonged to STs only found in this niche, compared to 41% in environment, 9% in cattle, 3% in sheep  
252 and 32% in chicken. Besides *C. jejuni*, an estimated 10% of campylobacteriosis cases are caused by  
253 *Campylobacter coli* (53). Consistent with previous studies, we found improved accuracy over  
254 attribution of *C. jejuni*, potentially reflecting more pronounced strain segregation by host (29), as well  
255 as a higher proportion of environmental and sheep associated strains in human infection (11,54,55)  
256 (Figure 3).

257

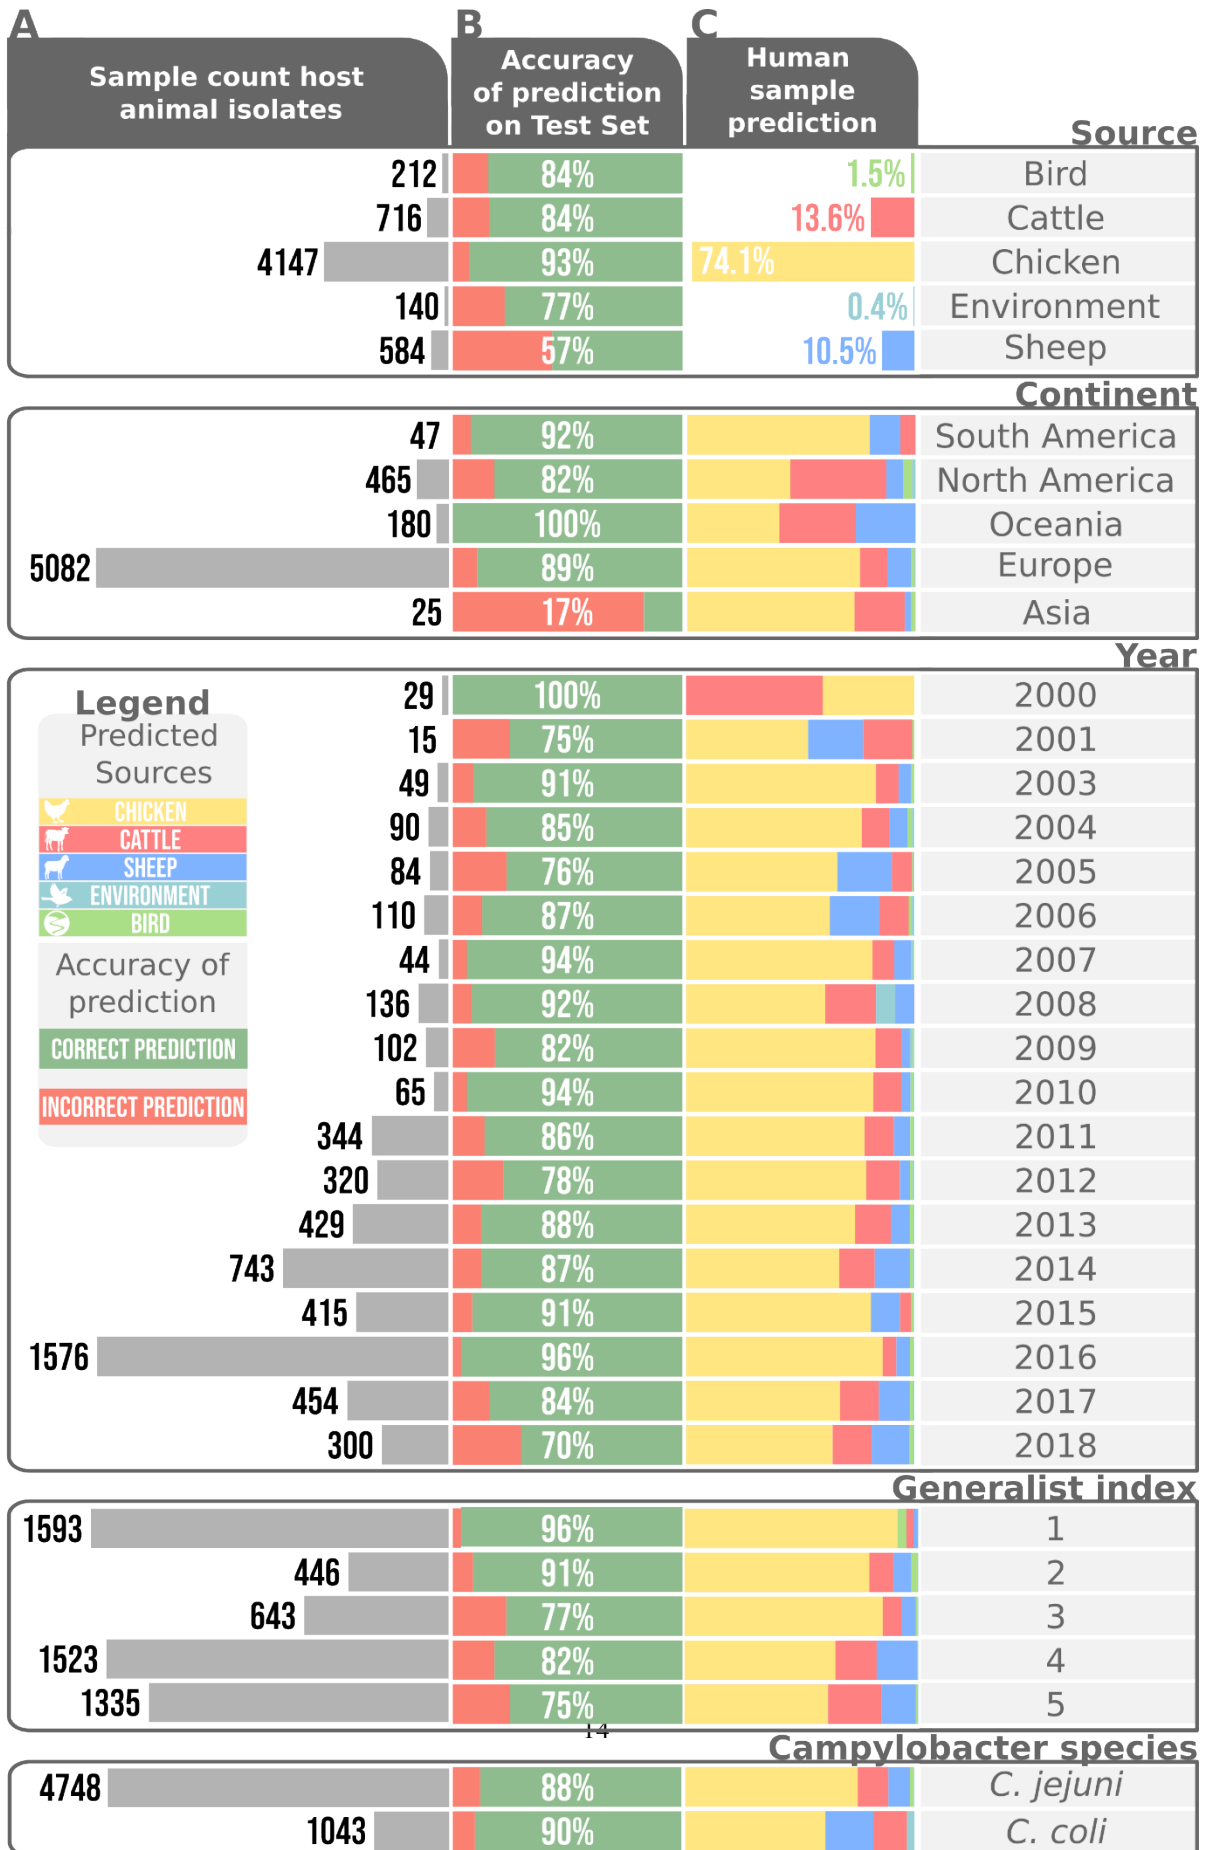

259 **Figure 3:** Source attribution per source, continent, year generalist index and *Campylobacter* species.

260 A) Sample sizes across different factors in the imbalanced training set. B) Prediction accuracy on the

261 full test dataset divided by different factors. C) Source attribution stratified into varying factors

262

263 Having analysed the classification accuracy within the dataset, the machine learning method was

264 compared to previous source attribution studies (Figure 4). Attribution of cases to chicken was

265 consistent with higher estimates from previous studies, resulting in less attribution to all other

266 sources, with environment identified as the source of just 0.4% of human infections. This differences

267 in our prediction to previous studies could reflect the greater discriminatory power of cgMLST data

268 over MLST.

269

270

271

**Comparison source attribution to previous studies**

|               | %  |  |  |  |  |  |  |  |
|---------------|----|-------------------------------------------------------------------------------------|-------------------------------------------------------------------------------------|-------------------------------------------------------------------------------------|-------------------------------------------------------------------------------------|---------------------------------------------------------------------------------------|---------------------------------------------------------------------------------------|---------------------------------------------------------------------------------------|
| Wilson 2009   | 57 | 36                                                                                  | 1                                                                                   | 4                                                                                   | 2                                                                                   |                                                                                       |                                                                                       |                                                                                       |
| Mullner 2009  | 67 | 19                                                                                  |                                                                                     | 11                                                                                  | 12                                                                                  |                                                                                       |                                                                                       |                                                                                       |
| Sheppard 2009 | 78 |                                                                                     | 4                                                                                   |                                                                                     | 4                                                                                   |                                                                                       | 18                                                                                    |                                                                                       |
| Kittl 2013    | 69 | 21                                                                                  |                                                                                     |                                                                                     |                                                                                     |                                                                                       |                                                                                       |                                                                                       |
| Strachan 2009 | 43 | 35                                                                                  | 6                                                                                   | 15                                                                                  |                                                                                     |                                                                                       |                                                                                       |                                                                                       |
| Gras 2012     | 66 | 21                                                                                  |                                                                                     | 3                                                                                   | 10                                                                                  |                                                                                       |                                                                                       |                                                                                       |
| Mossong 2016  | 61 |                                                                                     |                                                                                     |                                                                                     | 5                                                                                   |                                                                                       | 33                                                                                    |                                                                                       |
| Ravel 2017    | 69 | 14                                                                                  |                                                                                     |                                                                                     | 2                                                                                   |                                                                                       |                                                                                       |                                                                                       |
| Rosner 2017   | 74 | 0                                                                                   |                                                                                     |                                                                                     |                                                                                     |                                                                                       |                                                                                       |                                                                                       |
| Thepault 2018 | 56 |                                                                                     |                                                                                     |                                                                                     | 6                                                                                   |                                                                                       | 37                                                                                    |                                                                                       |
| Our Study     | 74 | 14                                                                                  | 1                                                                                   | 11                                                                                  | 0                                                                                   |                                                                                       | 25                                                                                    |                                                                                       |

272

273 **Figure 4:** Comparison of our source attribution to previously published studies

274

275 **The fine-grained structure of source attribution can be identified with**  
276 **machine learning**

277 Attribution predictions are inferred from the observed frequencies of genotypes in host reservoirs  
278 assessed through sampling. However, the relative source composition observed in sampling does not  
279 necessarily correspond to host contributions to human infection as some strains that are found at low  
280 frequency in the host could be more infectious to humans. For example, some *C. jejuni* strains increase  
281 in relative frequency through different stages of the poultry slaughter and production chain because  
282 they have genes that promote survival outside of the host (58). There is also evidence that there is a  
283 genetic bottleneck at the point of human infection that promotes colonization by strains that have  
284 specific genes conferring human niche tropism (59). Analysis of WGS or cgMLST data can potentially  
285 allow for changes in relative frequency and provide finer-grained source attribution, potentially at the  
286 level of the individual genome.

287

288 To identify evidence of differential host affinities, we applied treeBreaker (43) to trace the evolution  
289 of a host association along the phylogeny of CC-21, the most commonly found clonal complex in  
290 human infection (27). CC-21 frequently colonizes all host sources analysed in this study and is  
291 therefore considered a generalist strain, potentially complicating accurate attribution. TreeBreaker  
292 detected a change in host association on a branch that groups together a cattle-associated ST-21  
293 subgroup with the cattle-associated lineages ST-982 and ST-806 (Figure 5A). The source composition  
294 in this clade (asterisked in Figure 5A) differed from the rest of CC-21, which were predominantly  
295 composed of chicken and sheep isolates. Moreover, the asterisked clade differed in its propensity for  
296 transmission to humans. Overall, CC-21 was over-represented among human infections, perhaps



297 reflecting its generalist affinities. Yet the asterisked clade was over-represented only 1.7 to 3.6-fold,  
298 compared to 5.5 to 6.2-fold for the rest of CC-21 (Figure 5B).  
299

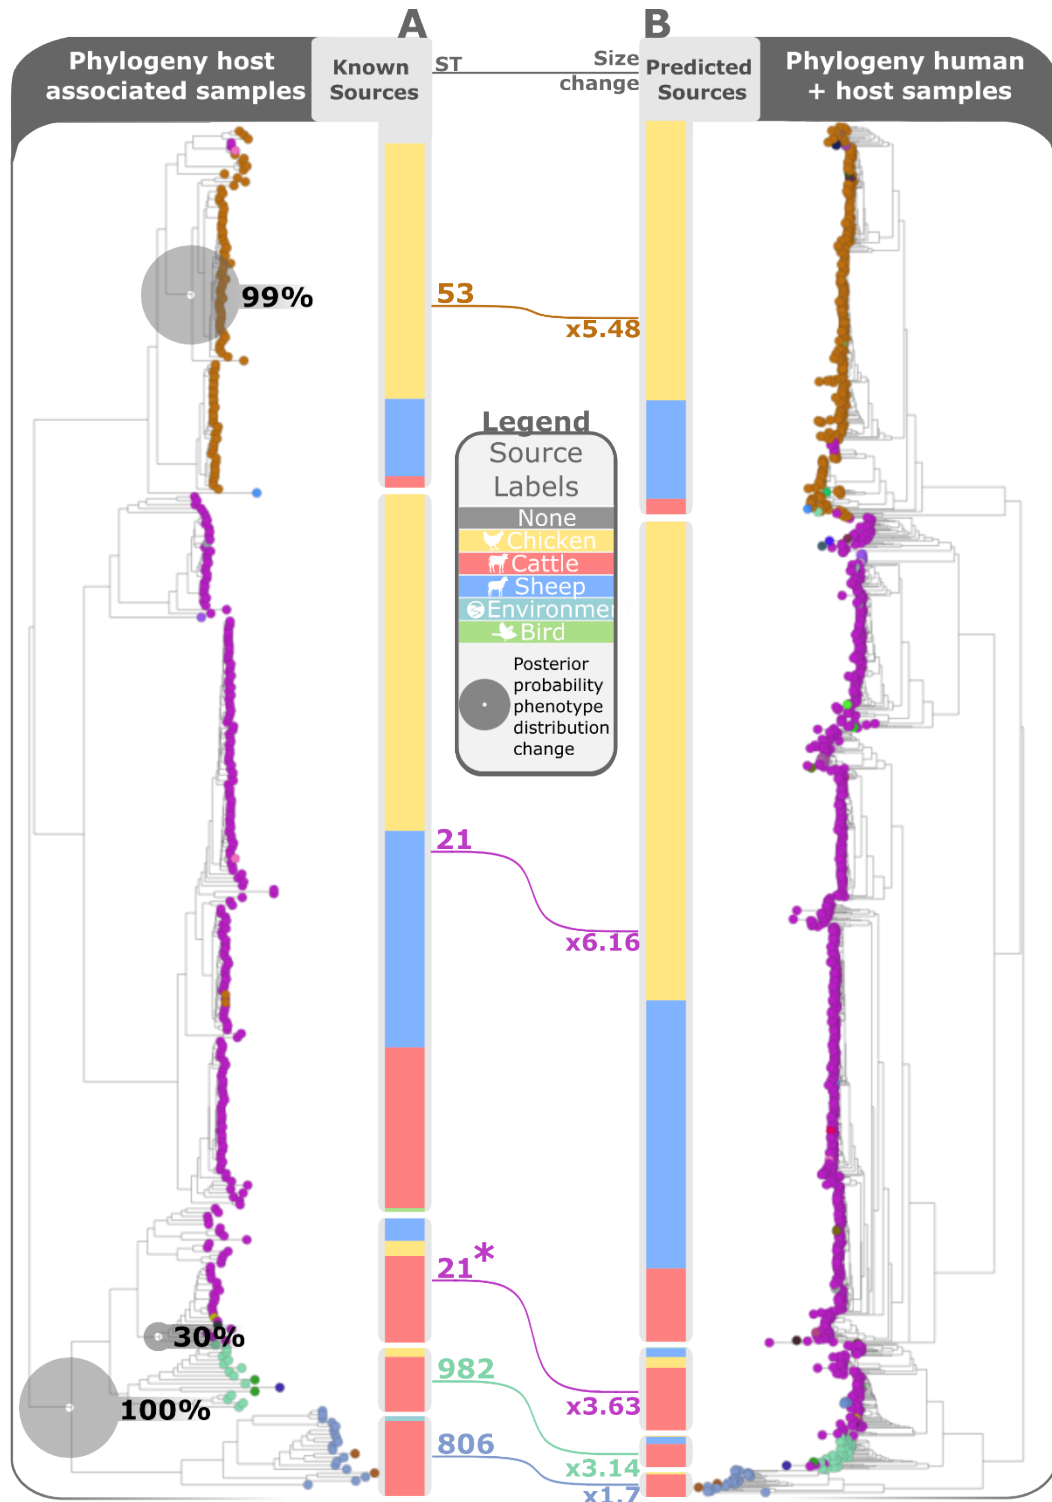

300

301 **Figure 5:** Phylogeny of clonal complex 21 of host animal associated samples (A) and bar charts showing

302 the known source distribution and human samples (B) alongside the predicted source distribution. The

303 phylogeny is based on Neighbour joining using hamming distance of the k-mers drawn from WGS. The  
304 connecting lines show the increase in frequency of the clades in human samples and the size of the  
305 grey circles show the posterior probability of a change in phenotypic distribution along the branches  
306 of the tree.

307

308 As the host association changed within CC-21, the ability to transmit to humans appears to have  
309 changed as well. This in turn induced a change in the source composition of CC-21 sampled from  
310 human infections compared to CC-21 sampled from animals. Previous studies analysing source  
311 attribution based on MLST would have overlooked these shifts.

## 312 **Outlook and conclusions**

313 The increasing availability of large pathogen genome datasets, algorithms and resources for  
314 analysing them, has created possibilities for investigating the transmission of zoonotic diseases that  
315 are incompletely understood. It is clear from the data presented here that tree-based ensemble  
316 methods for machine learning classification using bacterial genomic data provide considerable utility  
317 for improving the accuracy host source attribution for human campylobacteriosis. Key to the  
318 effectiveness of this approach is leveraging the full gradient of genomic differentiation afforded by  
319 WGS or cgMLST analysis. Host associated genetic variation can be observed in both core and  
320 accessory genes (60) but using these data presents practical considerations. With more  
321 computational resources available, it may be possible to analyse all k-mers present in the WGS  
322 samples (here 109,675,176 unique kmers) with multiple algorithms accompanied by cross-validation  
323 and bootstrap replication.

324

325 Beyond simple attribution to host source, resolving the fine-grained structure of genomic signatures

326 of association has considerable potential to account for differences in the relative frequency of sub-  
327 lineages in samples taken from reservoir hosts and human disease. This can provide important clues  
328 about the propensity of strains to survive outside of the host for long enough to transmit to humans  
329 as well as the capacity to colonize the human gut given the opportunity (58,59). This of course leads  
330 to questions about the genomic basis of bacterial adaptation, specifically the extent to which  
331 ‘associated’ genetic elements represent adaptations and whether the same genes and alleles enable  
332 colonisation of different host animals.

333

334 Improving on the approaches described here, better sampling and incremental training of the XGBoost  
335 classifier has considerable potential. The classifier’s low computational requirements and high  
336 prediction speed make it an excellent tool for analysing large genome datasets. Furthermore, by using  
337 phylogeny-aware train/test splitting for measuring performance, prediction remains accurate when  
338 new genetic variants are introduced because the algorithm can be incrementally trained with new  
339 data. This has considerable potential for developing automated and continuous disease surveillance  
340 systems to reduce campylobacteriosis that remains one of the most common food-borne illness in the  
341 world.

342

343

## 344 **Acknowledgments**

345 N. A. is a recipient of a BBSRC scholarship and thus supported by funding from the Biotechnology and  
346 Biological Sciences Research Council (BBSRC) (grant number BB/M011224/1). SKS was supported by  
347 Wellcome Trust (088786/C/09/Z) and Medical Research Council (MR/M501608/1 and  
348 MR/L015080/1) grants. D. J. W. is supported by a Sir Henry Dale Fellowship jointly funded by the  
349 Wellcome Trust and the Royal Society (grant number: 101237/Z/13/B) and by the Robertson  
350 Foundation. The research was supported by the National Institute for Health Research (NIHR) Oxford  
351 Biomedical Research Centre (BRC). The views expressed are those of the author(s) and not  
352 necessarily those of the NHS, the NIHR or the Department of Health.

353 N.A. would like to thank David Eyre, Christophe Fraser and Alexandra Casey for insightful comments.

354 Computation used the Oxford Biomedical Research Computing (BMRC) facility, a joint development  
355 between the Wellcome Centre for Human Genetics and the Big Data Institute supported by Health  
356 Data Research UK and the NIHR Oxford Biomedical Research Centre. The views expressed are those  
357 of the author(s) and not necessarily those of the NHS, the NIHR or the Department of Health.

358

## 359 **Conflicts of interest**

360 DAC declares grants from GlaxoSmithKline and personal fees from Oxford University Innovation,  
361 BioBeats, and Sensyne Health, in areas unrelated to this work

362

## 363 **Supporting information**

364

365 S1 Table. Metadata of all *Campylobacter* isolates used in this study. Contains the accession numbers,  
366 year and country of isolation, source label, generalist index, ST, CC ,prediction by our classifier,  
367 *Campylobacter species* and whether the samples were used in training or testing.

368

## 369 **References**

370

- 371 1. The European Union One Health 2018 Zoonoses Report. *EFSA J.* 2019;17(12):e05926.
- 372 2. Kaakoush NO, Castaño-Rodríguez N, Mitchell HM, Man SM. Global Epidemiology of  
373 *Campylobacter* Infection. *Clin Microbiol Rev.* 2015 Jul;28(3):687–720.
- 374 3. Sheppard SK, Colles FM, McCARTHY ND, Strachan NJC, Ogden ID, Forbes KJ, et al. Niche  
375 segregation and genetic structure of *Campylobacter jejuni* populations from wild and  
376 agricultural host species. *Mol Ecol.* 2011;20(16):3484–90.
- 377 4. Sheppard SK, Colles F, Richardson J, Cody AJ, Elson R, Lawson A, et al. Host Association of  
378 *Campylobacter* Genotypes Transcends Geographic Variation. *Appl Environ Microbiol.* 2010  
379 Aug;76(15):5269–77.
- 380 5. Nachamkin I, Allos BM, Ho T. *Campylobacter* Species and Guillain-Barré Syndrome. *Clin*  
381 *Microbiol Rev.* 1998 Jul;11(3):555–67.
- 382 6. Nielsen LN, Sheppard SK, McCarthy ND, Maiden MCJ, Ingmer H, Krogfelt KA. MLST clustering of  
383 *Campylobacter jejuni* isolates from patients with gastroenteritis, reactive arthritis and Guillain-  
384 Barré syndrome. *J Appl Microbiol.* 2010 Feb;108(2):591–9.
- 385 7. Altekruuse SF, Stern NJ, Fields PI, Swerdlow DL. *Campylobacter jejuni*—An Emerging Foodborne  
386 Pathogen. *Emerg Infect Dis.* 1999;5(1):28–35.
- 387 8. Gilbert MJ, Miller WG, Yee E, Zomer AL, van der Graaf-van Bloois L, Fitzgerald C, et al.  
388 Comparative Genomics of *Campylobacter fetus* from Reptiles and Mammals Reveals Divergent  
389 Evolution in Host-Associated Lineages. *Genome Biol Evol.* 2016 Jul 2;8(6):2006–19.
- 390 9. Kirk KF, Méric G, Nielsen HL, Pascoe B, Sheppard SK, Thorlacius-Ussing O, et al. Molecular  
391 epidemiology and comparative genomics of *Campylobacter concisus* strains from saliva, faeces  
392 and gut mucosal biopsies in inflammatory bowel disease. *Sci Rep.* 2018 Jan 30;8(1):1902.
- 393 10. Sheppard SK, Dallas JF, Wilson DJ, Strachan NJC, McCarthy ND, Jolley KA, et al. Evolution of an  
394 Agriculture-Associated Disease Causing *Campylobacter coli* Clade: Evidence from National  
395 Surveillance Data in Scotland. *PLOS ONE.* 2010 Dec 15;5(12):e15708.
- 396 11. Ogden ID, Dallas JF, MacRae M, Rotariu O, Reay KW, Leitch M, et al. *Campylobacter* excreted  
397 into the environment by animal sources: prevalence, concentration shed, and host association.  
398 *Foodborne Pathog Dis.* 2009 Dec;6(10):1161–70.
- 399 12. Institute of Environmental Science and Research Ltd. Notifiable and other diseases in New  
400 Zealand: Annual Report 2006. Porirua NZ Inst. 2007;
- 401 13. Sheppard SK, Dallas JF, MacRae M, McCarthy ND, Sproston EL, Gormley FJ, et al.

- 402 Campylobacter genotypes from food animals, environmental sources and clinical disease in  
403 Scotland 2005/6. *Int J Food Microbiol.* 2009 Aug 31;134(1–2):96–103.
- 404 14. Nichols GL, Richardson JF, Sheppard SK, Lane C, Sarran C. Campylobacter epidemiology: a  
405 descriptive study reviewing 1 million cases in England and Wales between 1989 and 2011. *BMJ*  
406 *Open.* 2012 Jan 1;2(4):e001179.
- 407 15. Sears A, Baker MG, Wilson N, Marshall J, Muellner P, Campbell DM, et al. Marked  
408 Campylobacteriosis Decline after Interventions Aimed at Poultry, New Zealand. *Emerg Infect*  
409 *Dis.* 2011 Jun;17(6):1007–15.
- 410 16. Nohra A, Grinberg A, Marshall JC, Midwinter AC, Collins-Emerson JM, French NP. Shifts in the  
411 Molecular Epidemiology of Campylobacter jejuni Infections in a Sentinel Region of New  
412 Zealand following Implementation of Food Safety Interventions by the Poultry Industry. *Appl*  
413 *Environ Microbiol* [Internet]. 2020 Feb 18 [cited 2021 Jan 6];86(5). Available from:  
414 <https://www.ncbi.nlm.nih.gov/pmc/articles/PMC7028974/>
- 415 17. Wilson DJ, Gabriel E, Leatherbarrow AJH, Cheesbrough J, Gee S, Bolton E, et al. Tracing the  
416 Source of Campylobacteriosis. *PLOS Genet.* 2008 Sep;4(9):e1000203.
- 417 18. Sheppard SK, Dallas JF, Strachan NJC, MacRae M, McCarthy ND, Wilson DJ, et al.  
418 Campylobacter Genotyping to Determine the Source of Human Infection. *Clin Infect Dis.* 2009  
419 *Apr*;48(8):1072–8.
- 420 19. Maiden MCJ, Bygraves JA, Feil E, Morelli G, Russell JE, Urwin R, et al. Multilocus sequence  
421 typing: A portable approach to the identification of clones within populations of pathogenic  
422 microorganisms. *Proc Natl Acad Sci U S A.* 1998 Mar;95(6):3140–5.
- 423 20. Dingle KE, Colles FM, Wareing DR, Ure R, Fox AJ, Bolton FE, et al. Multilocus sequence typing  
424 system for Campylobacter jejuni. *J Clin Microbiol.* 2001 Jan;39(1):14–23.
- 425 21. Pritchard JK, Stephens M, Donnelly P. Inference of Population Structure Using Multilocus  
426 Genotype Data. *Genetics.* 2000 Jun;155(2):945–59.
- 427 22. Mullner P, Spencer SEF, Wilson DJ, Jones G, Noble AD, Midwinter AC, et al. Assigning the  
428 source of human campylobacteriosis in New Zealand: A comparative genetic and  
429 epidemiological approach. *Infect Genet Evol.* 2009 Dec;9(6):1311–9.
- 430 23. Boysen L, Rosenquist H, Larsson JT, Nielsen EM, Sørensen G, Nordentoft S, et al. Source  
431 attribution of human campylobacteriosis in Denmark. *Epidemiol Infect.* 2014 Aug;142(8):1599–  
432 608.
- 433 24. Di Giannatale E, Garofolo G, Alessiani A, Di Donato G, Candeloro L, Vencia W, et al. Tracing Back  
434 Clinical Campylobacter jejuni in the Northwest of Italy and Assessing Their Potential Source.  
435 *Front Microbiol* [Internet]. 2016 Jun 13 [cited 2021 Feb 3];7. Available from:  
436 <https://www.ncbi.nlm.nih.gov/pmc/articles/PMC4904018/>
- 437 25. Kittl S, Heckel G, Korczak BM, Kuhnert P. Source Attribution of Human Campylobacter Isolates  
438 by MLST and Fla-Typing and Association of Genotypes with Quinolone Resistance. *PLOS ONE.*

- 439 2013 Nov;8(11):e81796.
- 440 26. Mourkas E, Taylor AJ, Méric G, Bayliss SC, Pascoe B, Mageiros L, et al. Agricultural  
441 intensification and the evolution of host specialism in the enteric pathogen *Campylobacter*  
442 *jejuni*. *Proc Natl Acad Sci*. 2020 May 19;117(20):11018–28.
- 443 27. Sheppard SK, Cheng L, Méric G, Haan CPA de, Llarena A-K, Marttinen P, et al. Cryptic ecology  
444 among host generalist *Campylobacter jejuni* in domestic animals. *Mol Ecol*. 2014;23(10):2442–  
445 51.
- 446 28. Woodcock DJ, Krusche P, Strachan NJC, Forbes KJ, Cohan FM, Méric G, et al. Genomic plasticity  
447 and rapid host switching can promote the evolution of generalism: a case study in the zoonotic  
448 pathogen *Campylobacter*. *Sci Rep*. 2017 Aug;7(1):1–13.
- 449 29. Dearlove BL, Cody AJ, Pascoe B, Méric G, Wilson DJ, Sheppard SK. Rapid host switching in  
450 generalist *Campylobacter* strains erodes the signal for tracing human infections. *ISME J*. 2016  
451 Mar;10(3):721–9.
- 452 30. Sheppard SK, Guttman DS, Fitzgerald JR. Population genomics of bacterial host adaptation. *Nat*  
453 *Rev Genet*. 2018 Sep;19(9):549–65.
- 454 31. Thépault A, Rose V, Quesne S, Poezevara T, Béven V, Hirchaud E, et al. Ruminant and chicken:  
455 important sources of campylobacteriosis in France despite a variation of source attribution in  
456 2009 and 2015. *Sci Rep*. 2018 Jun;8(1):9305.
- 457 32. Jehanne Q, Pascoe B, Bénéjat L, Ducournau A, Buissonnière A, Mourkas E, et al. Genome-Wide  
458 Identification of Host-Segregating Single-Nucleotide Polymorphisms for Source Attribution of  
459 Clinical *Campylobacter coli* Isolates. *Appl Environ Microbiol* [Internet]. 2020 Nov 24 [cited 2021  
460 Feb 3];86(24). Available from: <https://aem.asm.org/content/86/24/e01787-20>
- 461 33. Berthenet E, Thépault A, Chemaly M, Rivoal K, Ducournau A, Buissonnière A, et al. Source  
462 attribution of *Campylobacter jejuni* shows variable importance of chicken and ruminants  
463 reservoirs in non-invasive and invasive French clinical isolates. *Sci Rep*. 2019 May 30;9(1):8098.
- 464 34. Zhang S, Li S, Gu W, den Bakker H, Boxrud D, Taylor A, et al. Zoonotic Source Attribution of  
465 *Salmonella enterica* Serotype Typhimurium Using Genomic Surveillance Data, United States.  
466 *Emerg Infect Dis*. 2019;25(1):82–91.
- 467 35. Lupolova N, Dallman TJ, Holden NJ, Gally DL. Patchy promiscuity: machine learning applied to  
468 predict the host specificity of *Salmonella enterica* and *Escherichia coli*. *Microb Genomics*  
469 [Internet]. 2017 Oct [cited 2019 Sep 16];3(10). Available from:  
470 <https://www.ncbi.nlm.nih.gov/pmc/articles/PMC5695212/>
- 471 36. Lees JA, Mai TT, Galardini M, Wheeler NE, Horsfield ST, Parkhill J, et al. Improved Prediction of  
472 Bacterial Genotype-Phenotype Associations Using Interpretable Pangenome-Spanning  
473 Regressions. *mBio* [Internet]. 2020 Aug 25 [cited 2021 Feb 3];11(4). Available from:  
474 <https://mbio.asm.org/content/11/4/e01344-20>
- 475 37. Thépault A, Méric G, Rivoal K, Pascoe B, Mageiros L, Touzain F, et al. Genome-Wide



- 476 Identification of Host-Segregating Epidemiological Markers for Source Attribution in  
477 *Campylobacter jejuni*. *Appl Environ Microbiol*. 2017 Apr 1;83(7).
- 478 38. Rizk G, Lavenier D, Chikhi R. DSK: k-mer counting with very low memory usage. *Bioinformatics*.  
479 2013 Mar;29(5):652–3.
- 480 39. Chen T, Guestrin C. XGBoost: A Scalable Tree Boosting System. In: *Proceedings of the 22Nd*  
481 *ACM SIGKDD International Conference on Knowledge Discovery and Data Mining* [Internet].  
482 New York, NY, USA: ACM; 2016 [cited 2019 Sep 17]. p. 785–94. (KDD '16). Available from:  
483 <http://doi.acm.org/10.1145/2939672.2939785>
- 484 40. Pedregosa F, Varoquaux G, Gramfort A, Michel V, Thirion B, Grisel O, et al. Scikit-learn:  
485 Machine Learning in Python. *J Mach Learn Res*. 2011;12:2825–30.
- 486 41. Kingma DP, Ba J. Adam: A Method for Stochastic Optimization. *ArXiv14126980 Cs* [Internet].  
487 2014 Dec [cited 2019 Sep 17]; Available from: <http://arxiv.org/abs/1412.6980>
- 488 42. Hedge J, Wilson DJ. Bacterial Phylogenetic Reconstruction from Whole Genomes Is Robust to  
489 Recombination but Demographic Inference Is Not. *mBio* [Internet]. 2014 Dec 31 [cited 2020  
490 Nov 18];5(6). Available from: <https://mbio.asm.org/content/5/6/e02158-14>
- 491 43. Ansari MA, Didelot X. Bayesian Inference of the Evolution of a Phenotype Distribution on a  
492 Phylogenetic Tree. *Genetics*. 2016 Sep 1;204(1):89–98.
- 493 44. Argimón S, Abudahab K, Goater RJE, Fedosejev A, Bhai J, Glasner C, et al. Microreact: visualizing  
494 and sharing data for genomic epidemiology and phylogeography. *Microb Genomics*.  
495 2016;2(11):e000093.
- 496 45. Cody AJ, Maiden MC, Strachan NJ, McCarthy ND. A systematic review of source attribution of  
497 human campylobacteriosis using multilocus sequence typing. *Eurosurveillance* [Internet]. 2019  
498 Oct [cited 2020 Jan 27];24(43). Available from:  
499 <https://www.ncbi.nlm.nih.gov/pmc/articles/PMC6820127/>
- 500 46. Sheppard SK, Jolley KA, Maiden MCJ. A Gene-By-Gene Approach to Bacterial Population  
501 Genomics: Whole Genome MLST of *Campylobacter*. *Genes*. 2012 Apr 12;3(2):261–77.
- 502 47. Cody AJ, Bray JE, Jolley KA, McCarthy ND, Maiden MCJ. Core Genome Multilocus Sequence  
503 Typing Scheme for Stable, Comparative Analyses of *Campylobacter jejuni* and *C. coli* Human  
504 Disease Isolates. *J Clin Microbiol*. 2017 Jul;55(7):2086–97.
- 505 48. Austerlitz F, David O, Schaeffer B, Bleakley K, Olteanu M, Leblois R, et al. DNA barcode analysis:  
506 a comparison of phylogenetic and statistical classification methods. *BMC Bioinformatics*. 2009  
507 Nov;10(14):S10.
- 508 49. Deneke C, Rentzsch R, Renard BY. PaPrBaG: A machine learning approach for the detection of  
509 novel pathogens from NGS data. *Sci Rep*. 2017 Jan;7:39194.
- 510 50. Chen X, Ishwaran H. Random Forests for Genomic Data Analysis. *Genomics*. 2012  
511 Jun;99(6):323–9.

- 512 51. Kotsiantis SB, Zaharakis ID, Pintelas PE. Machine learning: a review of classification and  
513 combining techniques. *Artif Intell Rev.* 2006 Nov;26(3):159–90.
- 514 52. Kwan PSL, Birtles A, Bolton FJ, French NP, Robinson SE, Newbold LS, et al. Longitudinal Study of  
515 the Molecular Epidemiology of *Campylobacter jejuni* in Cattle on Dairy Farms. *Appl Environ*  
516 *Microbiol.* 2008 Jun;74(12):3626–33.
- 517 53. Sheppard SK, Maiden MCJ. The Evolution of *Campylobacter jejuni* and *Campylobacter coli*. *Cold*  
518 *Spring Harb Perspect Biol* [Internet]. 2015 Aug [cited 2019 Sep 3];7(8). Available from:  
519 <https://www.ncbi.nlm.nih.gov/pmc/articles/PMC4526750/>
- 520 54. Roux F, Sproston E, Rotariu O, MacRae M, Sheppard SK, Bessell P, et al. Elucidating the  
521 Aetiology of Human *Campylobacter coli* Infections. *PLoS ONE* [Internet]. 2013 May [cited 2020  
522 Feb 14];8(5). Available from: <https://www.ncbi.nlm.nih.gov/pmc/articles/PMC3667194/>
- 523 55. Strachan NJC, Gormley FJ, Rotariu O, Ogden ID, Miller G, Dunn GM, et al. Attribution of  
524 *Campylobacter* Infections in Northeast Scotland to Specific Sources by Use of Multilocus  
525 Sequence Typing. *J Infect Dis.* 2009 Apr;199(8):1205–8.
- 526 56. Pérez-Reche FJ, Rotariu O, Lopes BS, Forbes KJ, Strachan NJC. Mining whole genome sequence  
527 data to efficiently attribute individuals to source populations. *Sci Rep.* 2020 Jul 22;10(1):12124.
- 528 57. STRACHAN NJC, ROTARIU O, SMITH-PALMER A, COWDEN J, SHEPPARD SK, O'BRIEN SJ, et al.  
529 Identifying the seasonal origins of human campylobacteriosis. *Epidemiol Infect.* 2013  
530 Jun;141(6):1267–75.
- 531 58. Yahara K, Méric G, Taylor AJ, Vries SPW de, Murray S, Pascoe B, et al. Genome-wide association  
532 of functional traits linked with *Campylobacter jejuni* survival from farm to fork. *Environ*  
533 *Microbiol.* 2017;19(1):361–80.
- 534 59. Méric G, McNally A, Pessia A, Mourkas E, Pascoe B, Mageiros L, et al. Convergent Amino Acid  
535 Signatures in Polyphyletic *Campylobacter jejuni* Subpopulations Suggest Human Niche Tropism.  
536 *Genome Biol Evol.* 2018 Mar 1;10(3):763–74.
- 537 60. Sheppard SK, Didelot X, Méric G, Torralbo A, Jolley KA, Kelly DJ, et al. Genome-wide association  
538 study identifies vitamin B5 biosynthesis as a host specificity factor in *Campylobacter*. *Proc Natl*  
539 *Acad Sci.* 2013 Jul;110(29):11923–7.

540

|                    |                         | Accuracy on Balanced Test-set |        |                 |        |         | Accuracy on Test-set with source composition reflecting human infection |         |        |                 |        |         |        |
|--------------------|-------------------------|-------------------------------|--------|-----------------|--------|---------|-------------------------------------------------------------------------|---------|--------|-----------------|--------|---------|--------|
| Source composition |                         |                               |        |                 |        |         |                                                                         |         |        |                 |        |         |        |
| Simple learners    | K-nearest neighbour     | 47.1±3                        | 58.8±3 | 54.9±3          | 65.8±3 | 66.8±2  | 58.7±3                                                                  | 61.0±1  | 61.6±2 | 61.4±2          | 68.8±2 | 71.8±2  | 64.9±2 |
|                    | Ridge Regression        | 36.5±2                        | 65.5±3 | 62.1±3          | 29.0±3 | 66.3±3  | 51.9±3                                                                  | 40.0±1  | 64.0±2 | 63.8±2          | 35.7±2 | 69.9±2  | 54.7±2 |
|                    | SVM (Linear Kernel)     | 41.6±2                        | 66.7±3 | 54.0±3          | 50.8±3 | 67.2±2  | 56.1±3                                                                  | 41.5±1  | 67.9±2 | 53.6±2          | 53.2±2 | 70.0±2  | 57.2±2 |
|                    | SVM (RBF Kernel)        | 22.2±2                        | 66.0±3 | 63.0±3          | 20.0±0 | 65.0±3  | 47.2±2                                                                  | 40.0±1  | 66.3±2 | 64.0±2          | 39.2±0 | 67.4±2  | 55.4±1 |
|                    | Naive Bayesian          | 34.7±2                        | 45.9±3 | 45.2±2          | 42.2±2 | 54.8±3  | 44.6±3                                                                  | 30.9±2  | 30.3±2 | 27.8±1          | 38.5±2 | 55.0±2  | 36.5±2 |
|                    | Decision tree           | 43.6±3                        | 63.2±3 | 53.9±3          | 68.2±3 | 62.7±3  | 58.3±3                                                                  | 46.3±2  | 63.0±2 | 49.2±2          | 67.6±2 | 65.0±2  | 58.2±2 |
| Ensemble learners  | Random forest           | 61.9±3                        | 67.9±3 | 62.4±3          | 76.0±2 | 69.4±2  | 67.5±3                                                                  | 68.5±2  | 70.7±1 | 66.1±2          | 80.4±1 | 73.8±1  | 71.9±1 |
|                    | Extra-randomised forest | 59.5±3                        | 59.4±3 | 62.3±3          | 68.5±2 | 70.7±2  | 64.1±3                                                                  | 67.4±2  | 61.9±2 | 65.5±2          | 72.4±0 | 76.2±2  | 68.7±1 |
|                    | XGBoost                 | 59.9±3                        | 65.8±3 | 53.9±3          | 81.3±2 | 68.1±3  | 65.8±3                                                                  | 67.2±2  | 69.3±1 | 55.9±2          | 84.6±0 | 72.5±2  | 69.9±1 |
| Deep learners      | 1D-Convolutional NN     | 20.0±0                        | 58.2±2 | 62.3±3          | 60.4±3 | 75.0±3  | 55.2±2                                                                  | 39.2±0  | 64.2±1 | 67.5±2          | 65.9±2 | 78.3±1  | 63.0±1 |
|                    | Shallow Dense NN        | 19.7±0                        | 53.3±2 | 59.4±3          | 65.7±3 | 69.1±3  | 53.4±2                                                                  | 38.7±0  | 61.1±1 | 65.0±2          | 69.2±2 | 71.3±2  | 61.1±1 |
|                    | Deep Dense NN           | 20.0±0                        | 57.8±3 | 62.5±3          | 66.6±2 | 70.3±3  | 55.4±2                                                                  | 39.2±0  | 62.1±1 | 66.1±2          | 73.1±1 | 74.7±1  | 63.0±1 |
|                    | Recurrent NN            | 58.0±2                        | 58.7±3 | 58.5±3          | 66.3±2 | 74.1±3  | 63.1±3                                                                  | 66.2±1  | 64.2±1 | 61.3±2          | 72.5±1 | 77.5±2  | 68.3±1 |
|                    | LSTM NN                 | 60.8±3                        | 63.0±3 | 59.2±3          | 66.1±3 | 69.6±3  | 63.7±3                                                                  | 68.8±1  | 68.1±1 | 65.3±2          | 71.0±1 | 74.4±1  | 69.5±1 |
| Average            | 41.8±2                  | 60.7±3                        | 58.1±3 | 59.1±2          | 67.8±3 | Average | 51.1±1                                                                  | 62.5±1  | 59.5±2 | 63.7±1          | 71.3±2 | Average |        |
| iSource            | 61.0±0                  | Sequenc                       | K-mers | Allelic profile | K-mers | Average | 64.4±0                                                                  | Sequenc | K-mers | Allelic profile | K-mers | Average |        |
| Encoding           | Allelic profile         | Sequenc                       | K-mers | Allelic profile | K-mers | Average | Allelic profile                                                         | Sequenc | K-mers | Allelic profile | K-mers | Average |        |
| Dataset            |                         | MLST                          |        | cgMLST          | WGS    |         |                                                                         | MLST    |        | cgMLST          | WGS    |         |        |

Figure 1

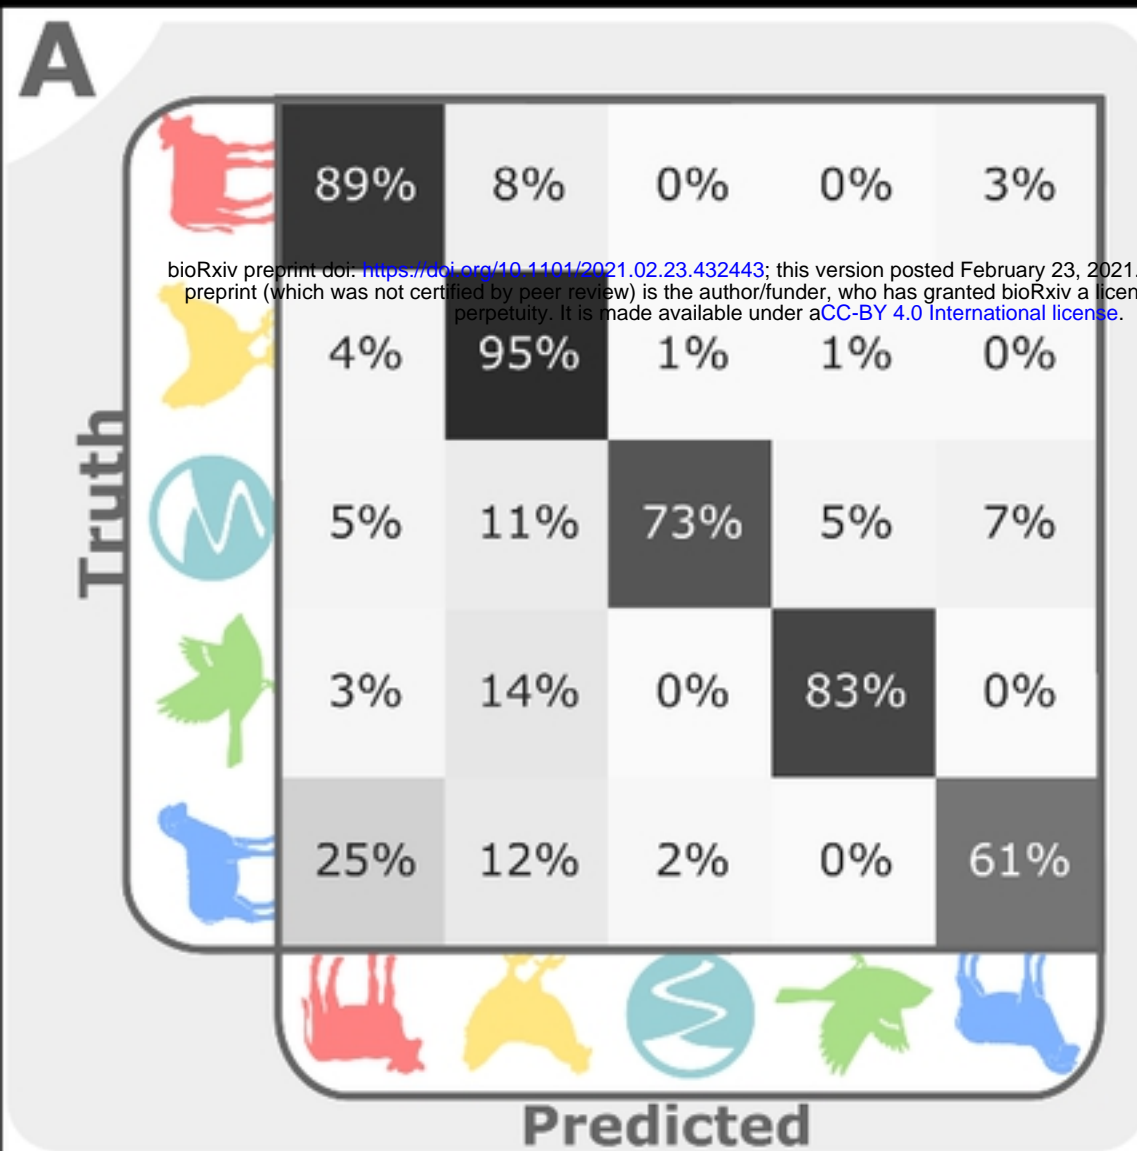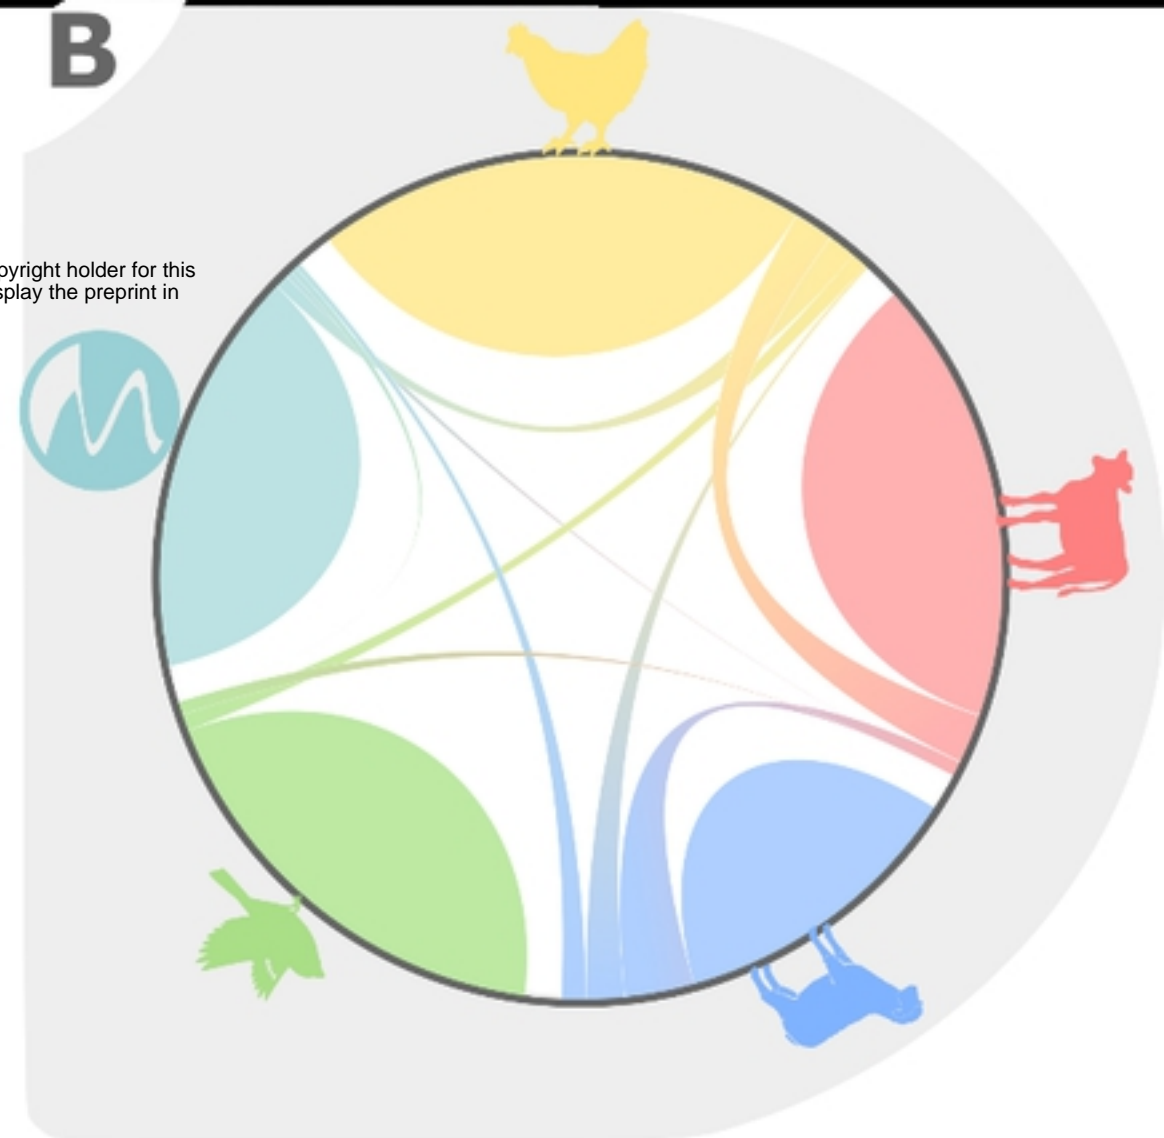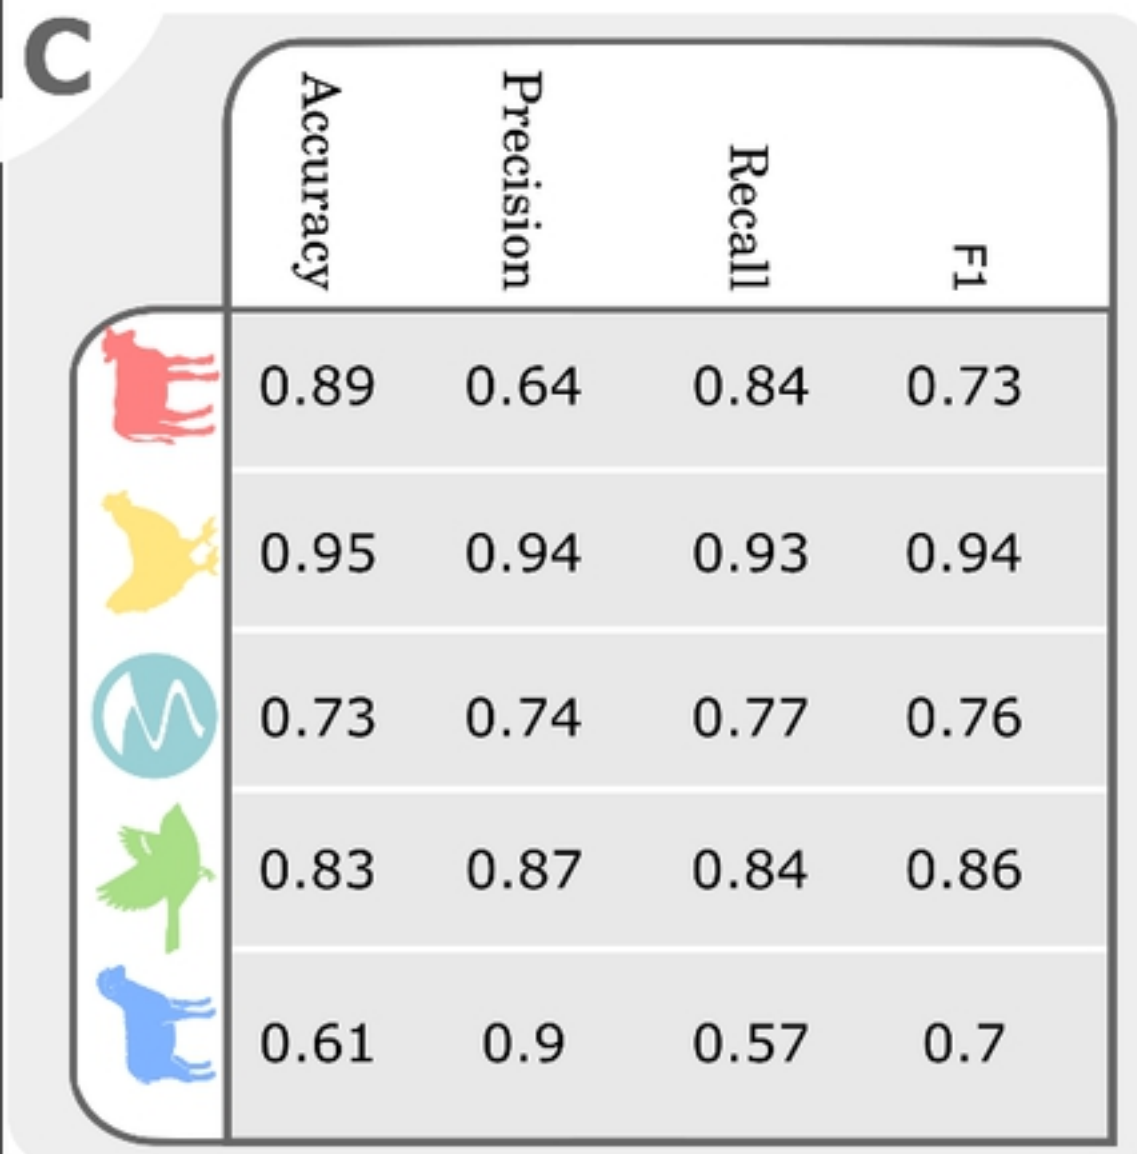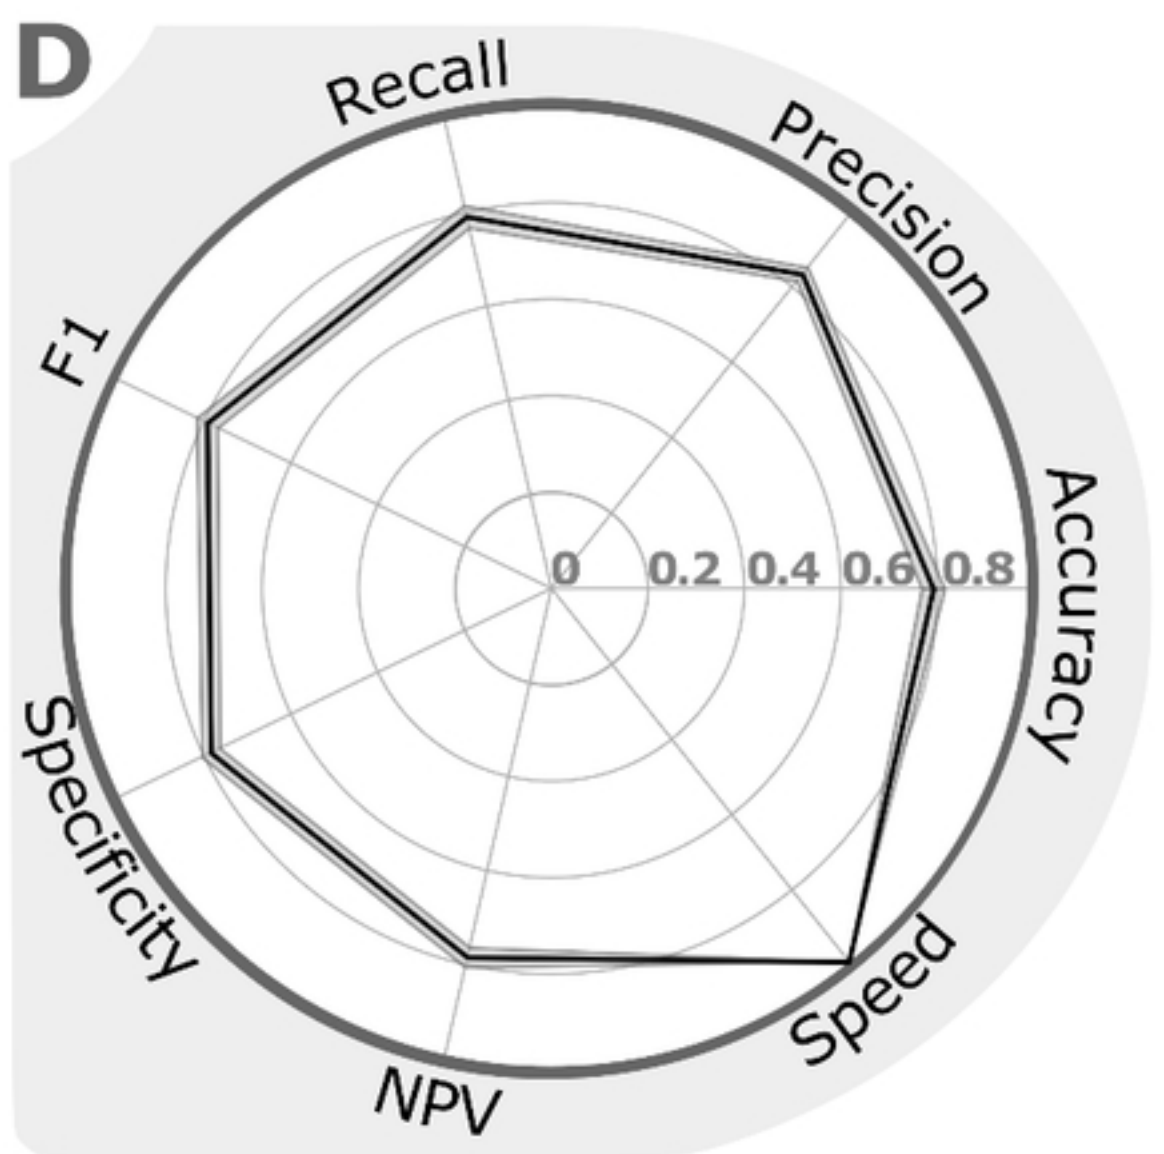

Figure 2

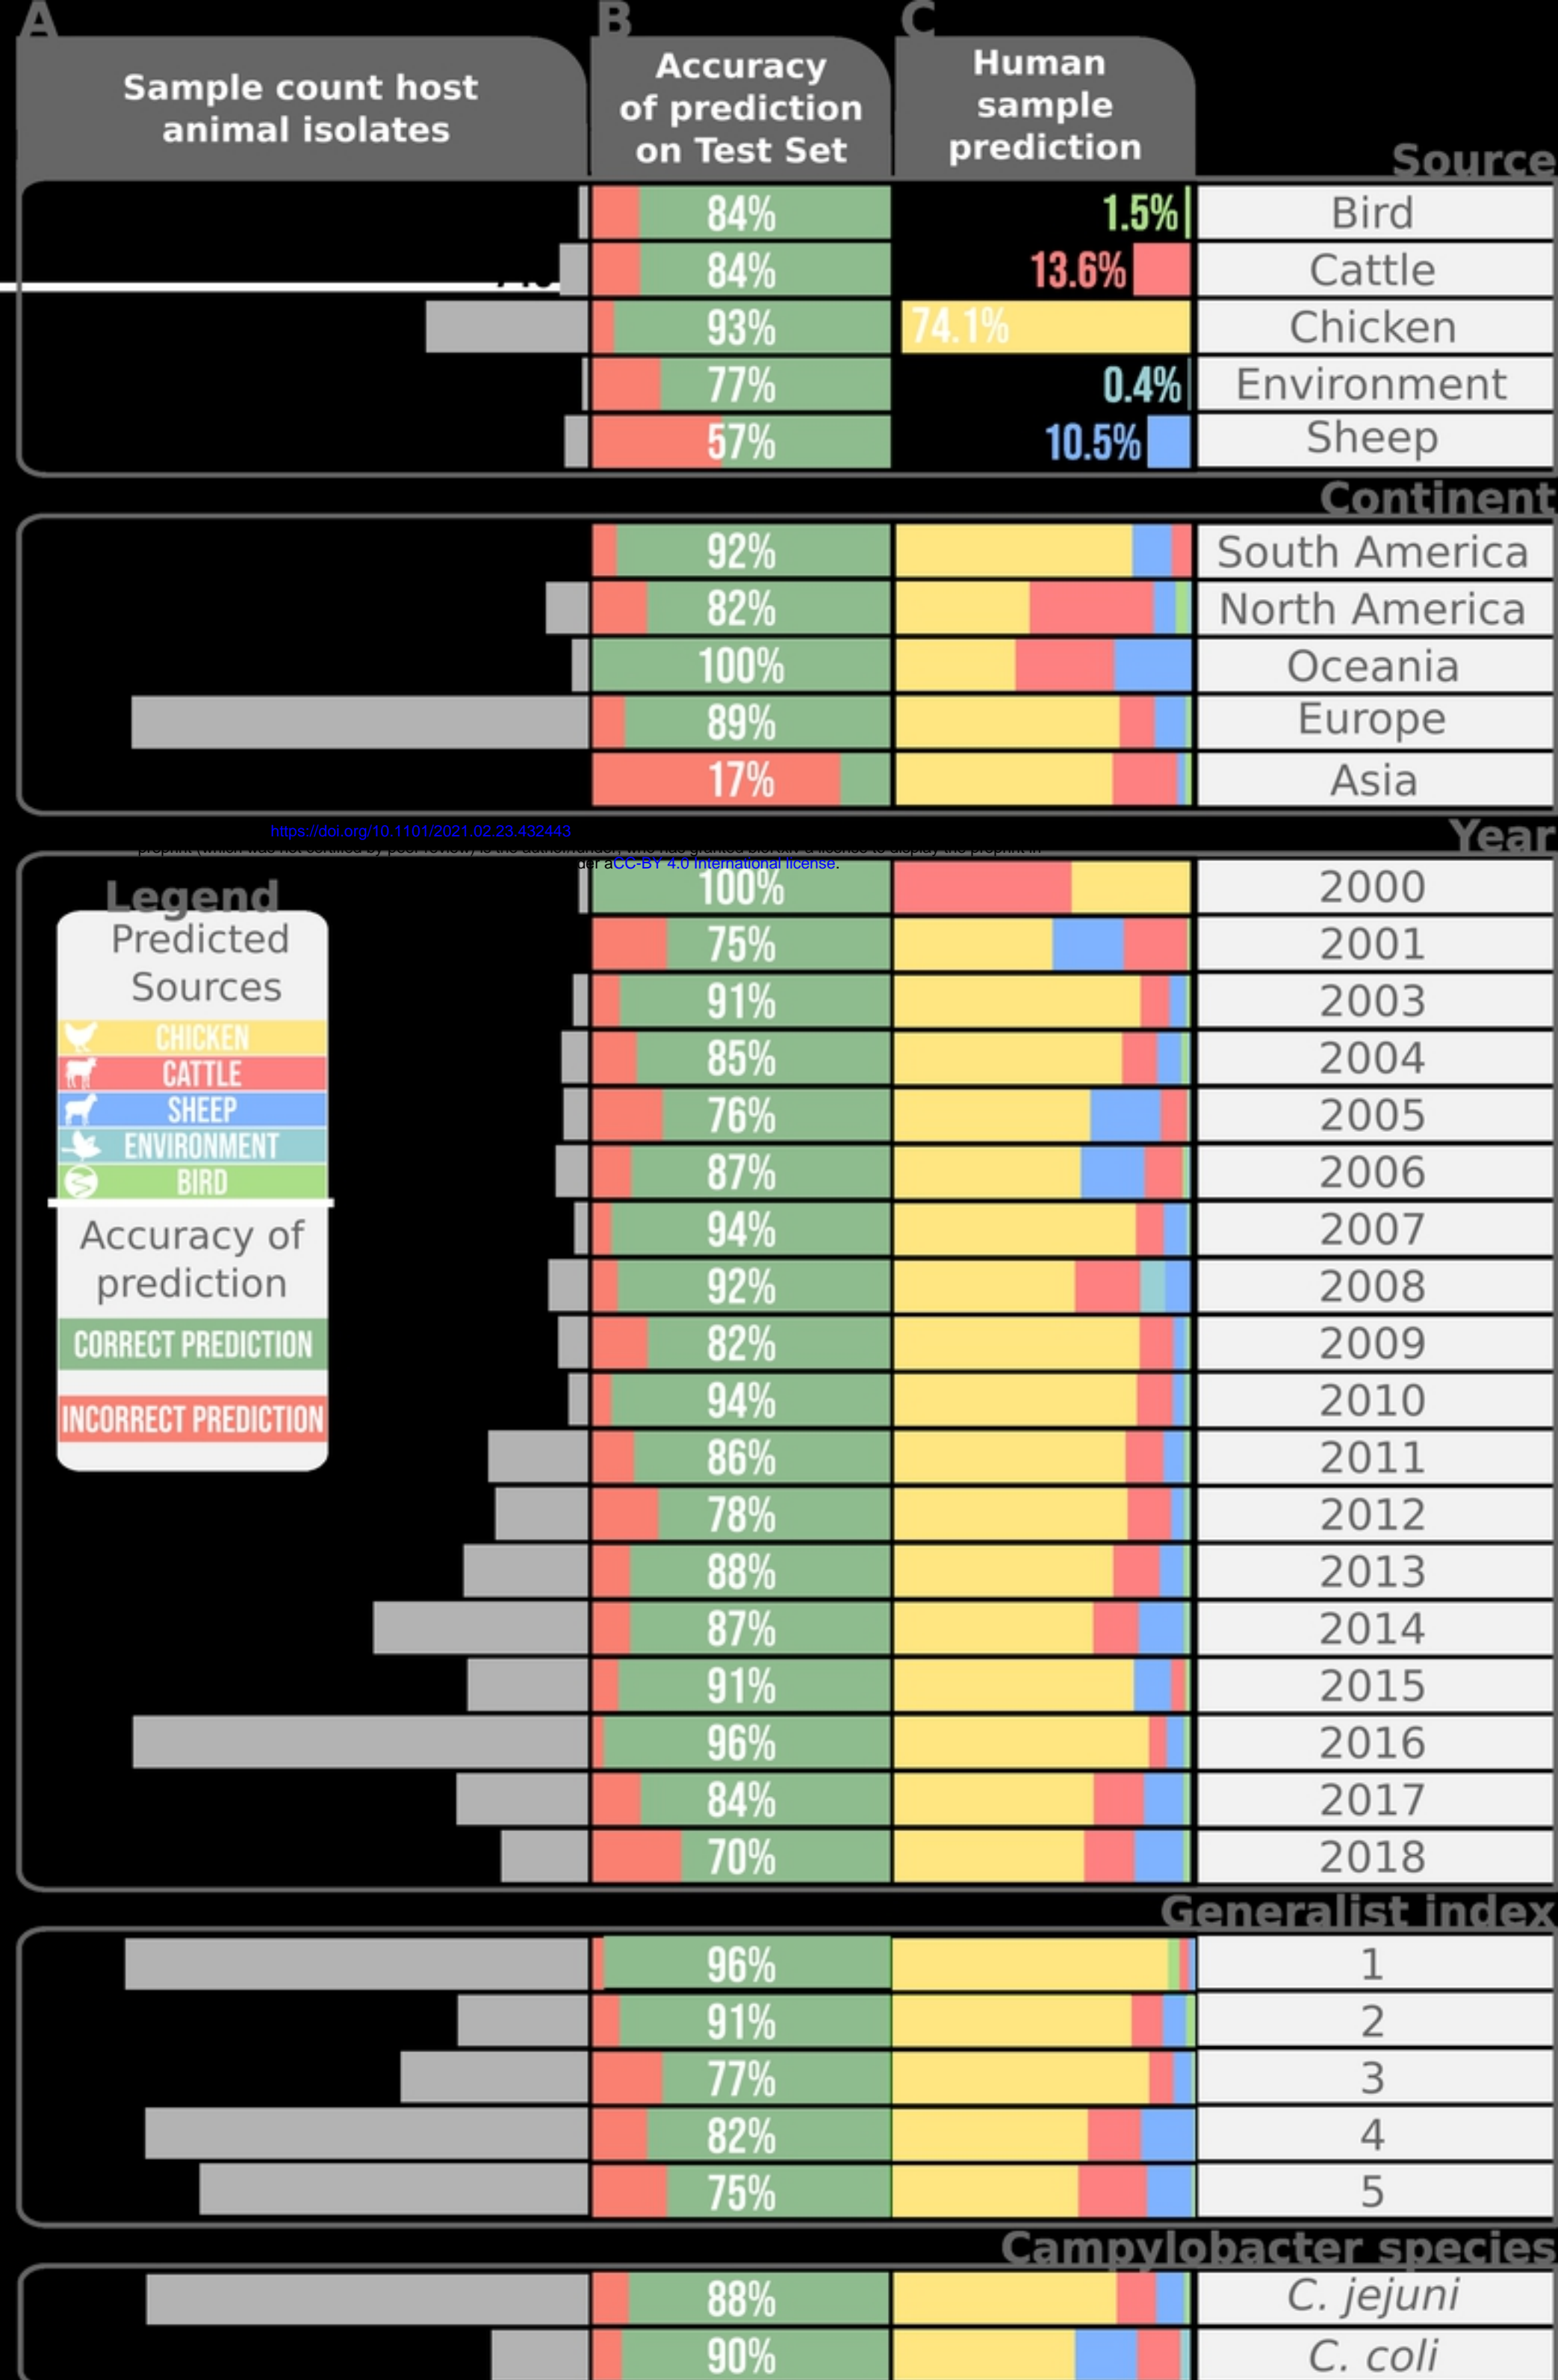

Figure 3

# Comparison source attribution to previous studies

| %             |  |  |  |  |  |  |
|---------------|-----------------------------------------------------------------------------------|-----------------------------------------------------------------------------------|------------------------------------------------------------------------------------|-------------------------------------------------------------------------------------|-------------------------------------------------------------------------------------|-------------------------------------------------------------------------------------|
| Wilson 2009   | 57                                                                                | 36                                                                                | 1                                                                                  | 4                                                                                   | 2                                                                                   |                                                                                     |
| Mullner 2009  | 67                                                                                | 19                                                                                |                                                                                    | 11                                                                                  | 12                                                                                  |                                                                                     |
| Sheppard 2009 | 78                                                                                |                                                                                   | 4                                                                                  |                                                                                     | 4                                                                                   | 18                                                                                  |
| Kittl 2013    | 69                                                                                | 21                                                                                |                                                                                    |                                                                                     |                                                                                     |                                                                                     |
| Strachan 2009 | 43                                                                                | 35                                                                                | 6                                                                                  | 15                                                                                  |                                                                                     |                                                                                     |
| Gras 2012     | 66                                                                                | 21                                                                                |                                                                                    | 3                                                                                   | 10                                                                                  |                                                                                     |
| Mossong 2016  | 61                                                                                |                                                                                   |                                                                                    |                                                                                     | 5                                                                                   | 33                                                                                  |
| Ravel 2017    | 69                                                                                | 14                                                                                |                                                                                    |                                                                                     | 2                                                                                   |                                                                                     |
| Rosner 2017   | 74                                                                                | 0                                                                                 |                                                                                    |                                                                                     |                                                                                     |                                                                                     |
| Thepault 2018 | 56                                                                                |                                                                                   |                                                                                    |                                                                                     | 6                                                                                   | 37                                                                                  |
| Our Study     | 74                                                                                | 14                                                                                | 1                                                                                  | 11                                                                                  | 0                                                                                   | 25                                                                                  |

Figure 4

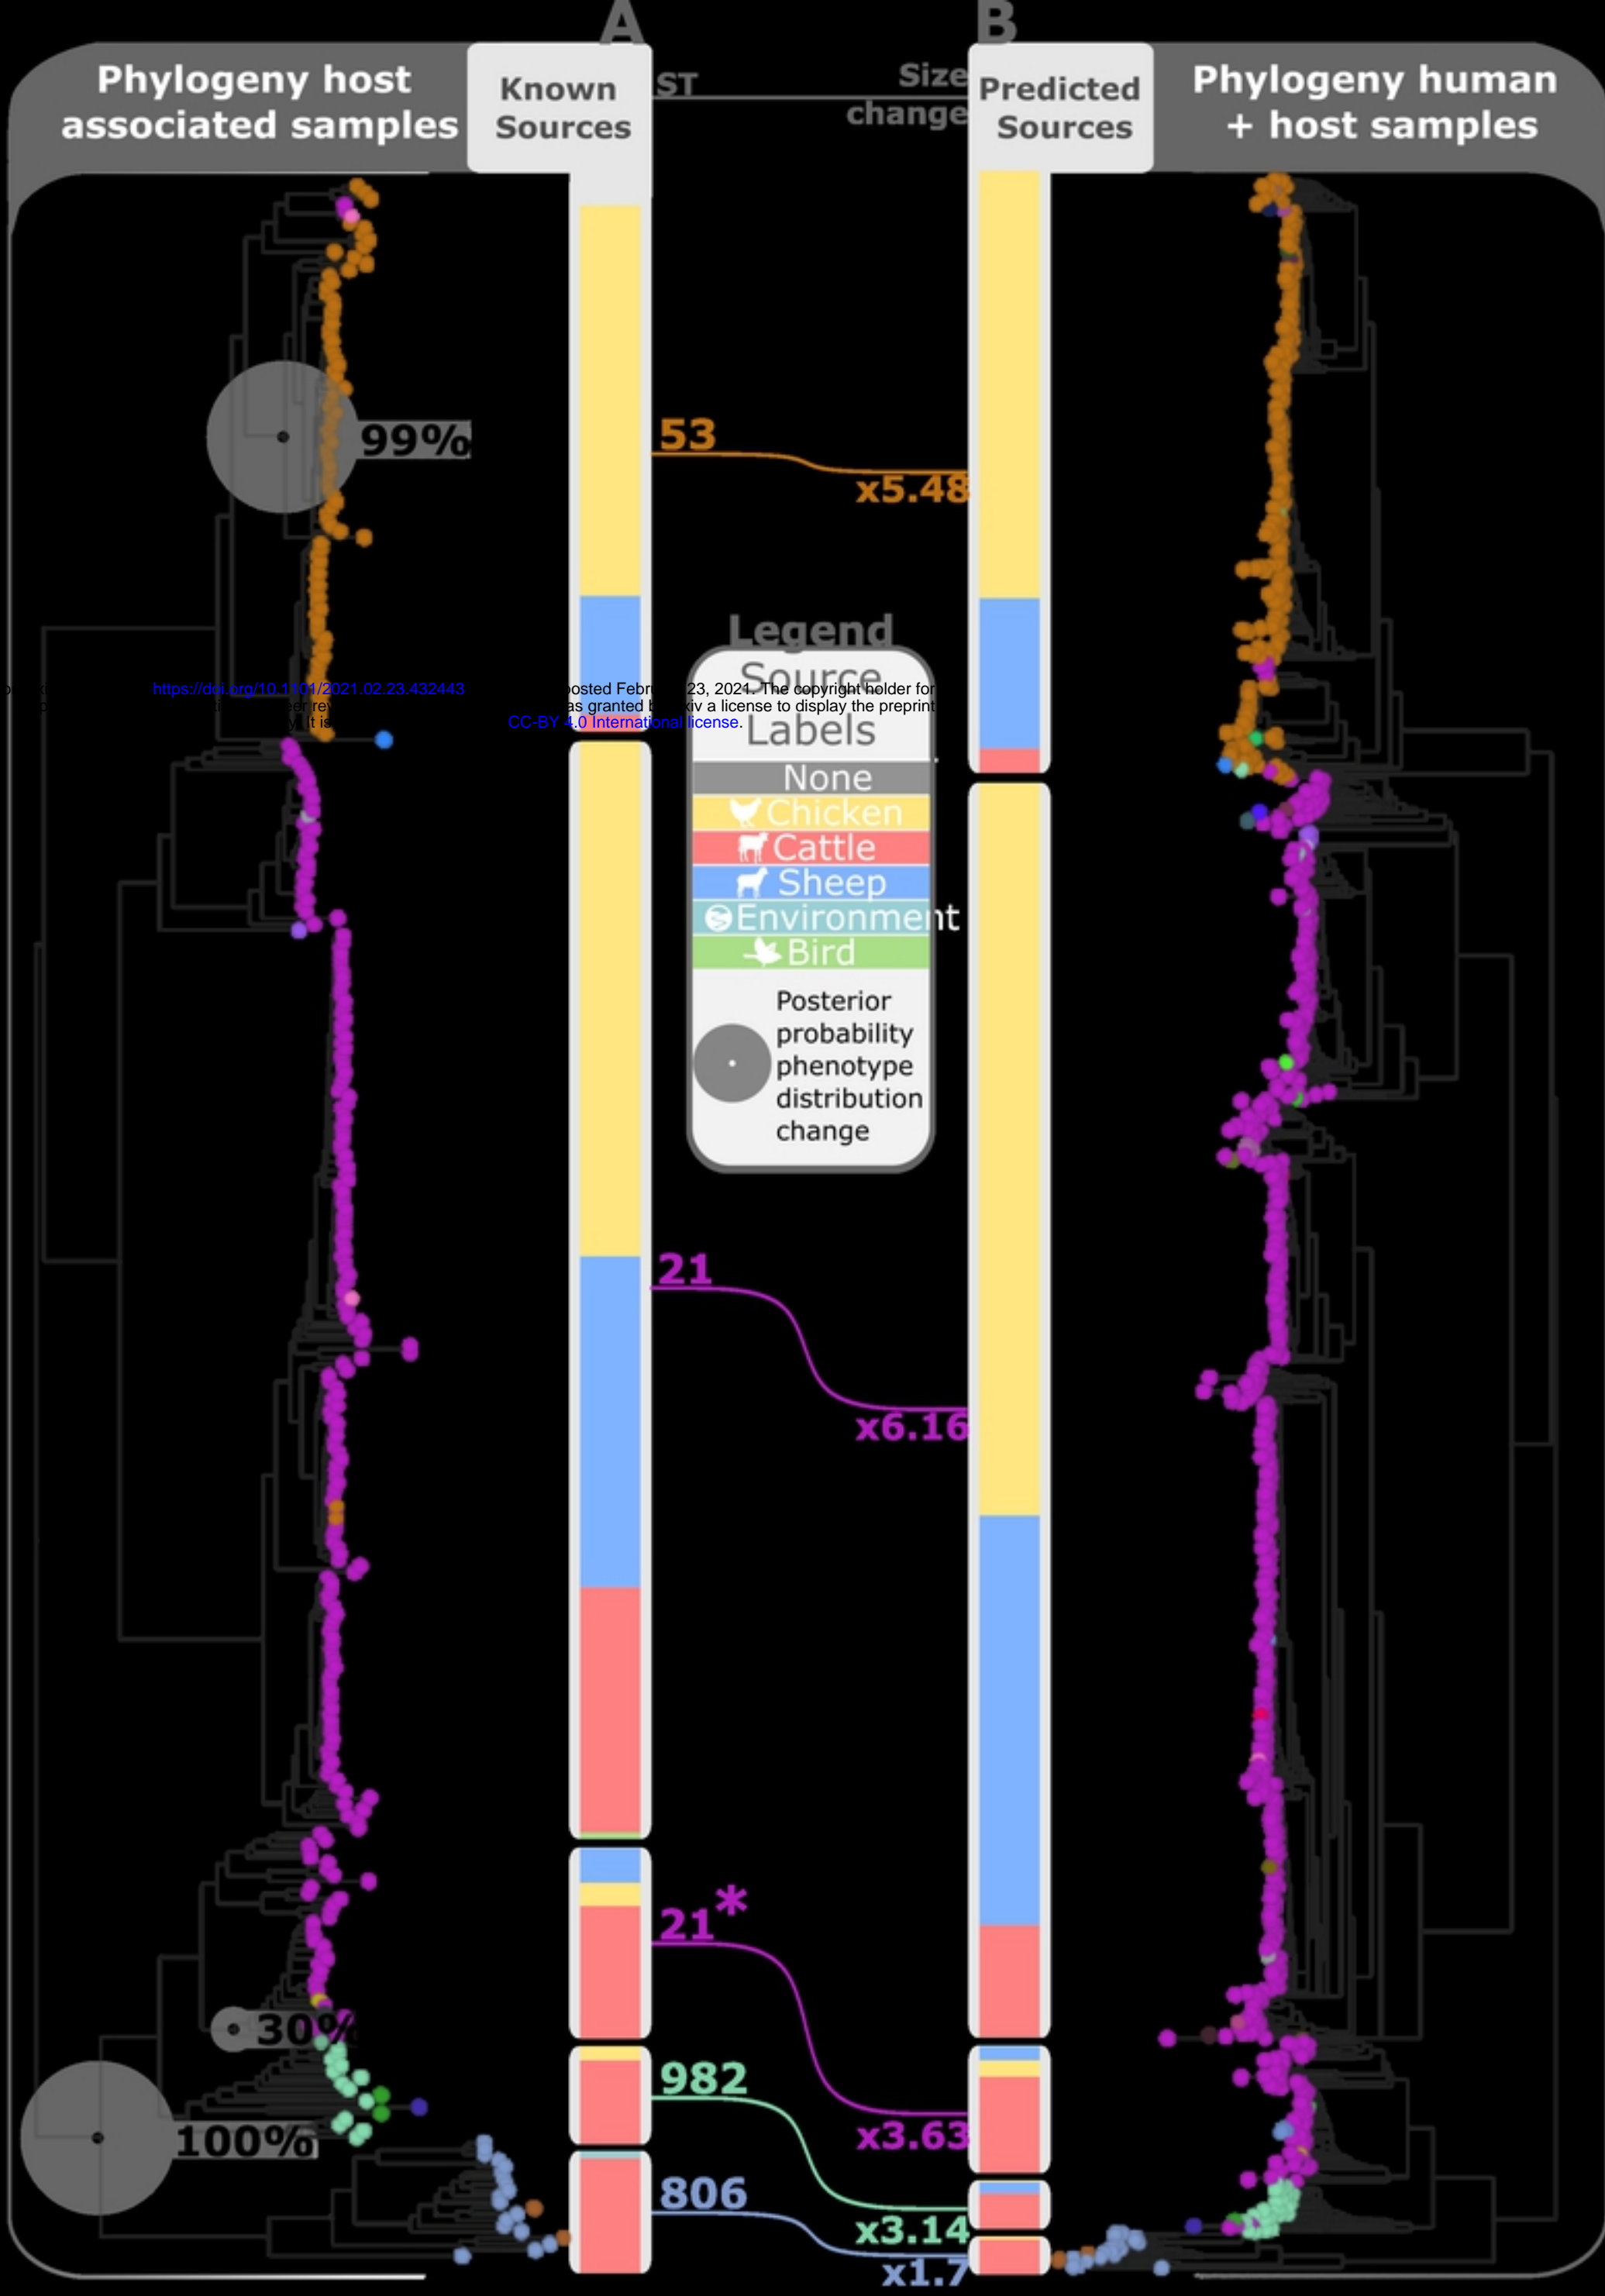

Figure 5
